# Supplementary material for: Evaluating the Robustness of Biomarkers of Dairy Food Intake in a Free-Living Population Using Single- and Multi-Marker Approaches
Source: MDPI journal article supplement (doi:10.3390/metabo11060395), 2021-06-17
Supplement: s1 [file s1]

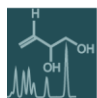

# Evaluating the robustness of biomarkers of dairy food intake in a free-living population using single- and multi-marker approaches

Katherine J. Li<sup>1,2</sup>, Kathryn J. Burton-Pimentel<sup>2\*</sup>, Elske M. Brouwer-Brolsma<sup>1</sup>, Edith J.M. Feskens<sup>1</sup>, Carola Blaser<sup>2</sup>, René Badertscher<sup>2</sup>, Reto Portmann<sup>2</sup>, Guy Vergères<sup>2</sup>

<sup>1</sup> Division of Human Nutrition and Health, Department of Agrotechnology and Food Sciences, Wageningen University & Research, P.O. Box 17, 6700 AA Wageningen, The Netherlands; katharine.li@wur.nl (K.J.L.); elske.brouwer-brolsma@wur.nl (E.M.B-B.); edith.feskens@wur.nl (E.J.M.F.)

<sup>2</sup> Agroscope, Federal Office for Agriculture (FOAG), Federal Department of Economic Affairs, Education and Research (EAER), Schwarzenburgstrasse 161, CH-3003 Bern, Switzerland; kathryn.pimentel@agroscope.admin.ch (K.J.B-P.); carola.blaser@agroscope.admin.ch (C.B.); rene.badertscher@agroscope.admin.ch (R.B.); reto.portmann@agroscope.admin.ch (R.P.); guy.vergeres@agroscope.admin.ch (G.V.)

\* Correspondence: kathryn.pimentel@agroscope.admin.ch, Tel.: +41 (0) 58 467 3187

**Table S1.** Quintiles of intake for dairy groups and dairy foods in men ( $n = 165$ ).

| Food Group                   | Median Energy-Adjusted Intakes in g/day |                 |                |                 |                |                 |                |                 |                |                 |
|------------------------------|-----------------------------------------|-----------------|----------------|-----------------|----------------|-----------------|----------------|-----------------|----------------|-----------------|
|                              | n <sub>c</sub>                          | Q1 ( $n = 33$ ) | n <sub>c</sub> | Q2 ( $n = 33$ ) | n <sub>c</sub> | Q3 ( $n = 33$ ) | n <sub>c</sub> | Q4 ( $n = 33$ ) | n <sub>c</sub> | Q5 ( $n = 33$ ) |
| Total dairy                  | 33                                      | 109 (801, 132)  | 33             | 216 (188, 237)  | 33             | 289 (270, 316)  | 33             | 359 (349, 383)  | 33             | 514 (465, 613)  |
| High-fat dairy               | 32                                      | 12 (7, 16)      | 33             | 26 (22, 29)     | 33             | 44 (37, 51)     | 33             | 74 (65, 84)     | 33             | 138 (113, 176)  |
| Low-fat dairy                | 33                                      | 39 (15, 55)     | 33             | 140 (118, 167)  | 33             | 237 (215, 254)  | 33             | 313 (298, 327)  | 33             | 472 (390, 597)  |
| Total fermented dairy        | 33                                      | 47 (24, 59)     | 33             | 94 (76, 114)    | 33             | 143 (134, 156)  | 33             | 226 (205, 242)  | 33             | 329 (293, 355)  |
| High-fat fermented dairy     | 7                                       | 2 (-1, 5)       | 33             | 10 (8, 11)      | 33             | 18 (16, 21)     | 33             | 35 (28, 46)     | 33             | 83 (67, 108)    |
| Low-fat fermented dairy      | 32                                      | 16 (6, 24)      | 33             | 53 (43, 64)     | 33             | 110 (102, 122)  | 33             | 197 (157, 213)  | 33             | 304 (268, 348)  |
| Total non-fermented dairy    | 32                                      | 15 (6, 23)      | 33             | 53 (42, 64)     | 33             | 102 (94, 114)   | 33             | 173 (159, 201)  | 33             | 300 (274, 360)  |
| High-fat non-fermented dairy | 27                                      | 4 (1, 6)        | 33             | 11 (10, 13)     | 33             | 19 (16, 21)     | 33             | 36 (30, 42)     | 33             | 62 (51, 91)     |
| Low-fat non-fermented dairy  | 0                                       | -3 (-8, 2)      | 19             | 17 (14, 23)     | 33             | 65 (53, 82)     | 33             | 137 (122, 153)  | 33             | 284 (255, 355)  |
| Cheese                       | 32                                      | 8 (4, 12)       | 33             | 19 (17, 23)     | 33             | 29 (27, 32)     | 33             | 45 (40, 49)     | 33             | 68 (62, 94)     |
| Yoghurt                      | 9                                       | 0 (-3, 5)       | 33             | 41 (27, 52)     | 33             | 88 (73, 94)     | 33             | 133 (109, 138)  | 33             | 189 (151, 208)  |
| Milk                         | 11                                      | 4 (-5, 11)      | 33             | 39 (30, 49)     | 33             | 82 (73, 96)     | 33             | 157 (142, 191)  | 33             | 287 (259, 355)  |

FFQ, food frequency questionnaire; n<sub>c</sub>, number of consumers. Values are reported as median (IQR), unless otherwise specified.

**Table S2.** Quintiles of intake for dairy groups and dairy foods in women ( $n = 81$ ).

| Food Group                   | Median Energy-Adjusted Intakes in g/day |                 |                |                 |                |                 |                |                 |                |                 |
|------------------------------|-----------------------------------------|-----------------|----------------|-----------------|----------------|-----------------|----------------|-----------------|----------------|-----------------|
|                              | n <sub>c</sub>                          | Q1 ( $n = 17$ ) | n <sub>c</sub> | Q2 ( $n = 16$ ) | n <sub>c</sub> | Q3 ( $n = 16$ ) | n <sub>c</sub> | Q4 ( $n = 16$ ) | n <sub>c</sub> | Q5 ( $n = 16$ ) |
| Total dairy                  | 17                                      | 87 (67, 115)    | 16             | 228 (207, 241)  | 16             | 338 (316, 344)  | 16             | 388 (370, 408)  | 16             | 545 (496, 608)  |
| High-fat dairy               | 15                                      | 5 (3, 11)       | 16             | 23 (20, 26)     | 16             | 36 (32, 47)     | 16             | 67 (62, 67)     | 16             | 126 (107, 150)  |
| Low-fat dairy                | 16                                      | 5 (29, 72)      | 16             | 160 (143, 189)  | 16             | 258 (242, 265)  | 16             | 338 (322, 349)  | 16             | 521 (449, 577)  |
| Total fermented dairy        | 16                                      | 31 (16, 36)     | 16             | 84 (57, 93)     | 16             | 156 (137, 170)  | 16             | 216 (198, 228)  | 16             | 366 (317, 424)  |
| High-fat fermented dairy     | 2                                       | 0 (-2, 2)       | 16             | 8 (6, 10)       | 16             | 16 (14, 21)     | 16             | 36 (29, 41)     | 16             | 80 (58, 120)    |
| Low-fat fermented dairy      | 16                                      | 14 (9, 23)      | 16             | 39 (34, 52)     | 16             | 109 (90, 123)   | 16             | 189 (166, 203)  | 16             | 302 (275, 397)  |
| Total non-fermented dairy    | 16                                      | 17 (-8, 40)     | 16             | 56 (52, 73)     | 16             | 119 (109, 128)  | 16             | 190 (163, 219)  | 16             | 345 (311, 375)  |
| High-fat non-fermented dairy | 14                                      | 1 (-2, 3)       | 16             | 9 (7, 10)       | 16             | 14 (13, 17)     | 16             | 22 (19, 27)     | 16             | 55 (38, 77)     |
| Low-fat non-fermented dairy  | 0                                       | 6 (-16, 12)     | 15             | 39 (36, 43)     | 16             | 102 (67, 112)   | 16             | 159 (141, 182)  | 16             | 334 (292, 366)  |
| Cheese                       | 14                                      | 9 (5, 12)       | 16             | 16 (15, 17)     | 16             | 22 (21, 30)     | 16             | 39 (35, 42)     | 16             | 70 (55, 80)     |
| Yoghurt                      | 7                                       | 9 (3, 12)       | 16             | 26 (21, 39)     | 16             | 71 (63, 84)     | 16             | 124 (105, 135)  | 16             | 191 (155, 290)  |
| Milk                         | 2                                       | 11 (-10, 20)    | 16             | 43 (40, 51)     | 16             | 105 (96, 116)   | 16             | 168 (151, 196)  | 16             | 334 (295, 362)  |

FFQ, food frequency questionnaire; n<sub>c</sub>, number of consumers. Values are reported as median (IQR), unless otherwise specified.

**Table S3.** Previously-identified candidate FIBs for milk, cheese and yoghurt with their platforms and biosamples of detection.

| Biomarker                  | Analytical Platform | Biosample <sup>a</sup> | Reference |
|----------------------------|---------------------|------------------------|-----------|
| <b>Milk</b>                |                     |                        |           |
| Pentadecanoic acid (C15:0) | GC-MS               | Serum                  | [1]       |
| Heptadecanoic acid (C17:0) | GC-MS               | Serum                  | [1]       |
| Phenylalanine              | LC-MS               | Serum                  | [2]       |
| Asparagine                 | LC-MS               | Serum                  | [2]       |
| Tyrosine                   | LC-MS               | Serum                  | [2]       |
| Tryptophan                 | LC-MS               | Serum                  | [2]       |
| Taurine                    | LC-MS               | Serum                  | [2]       |
| Indole-3-propionic acid    | LC-MS               | Serum                  | [2]       |
| Indole-3-acetic acid       | LC-MS               | Serum                  | [2]       |
| Lactose                    | GC-MS               | Urine                  | [3]       |
|                            | GC-MS               | Serum                  | [1]       |
|                            | NMR                 | Urine                  | [3]       |
| Galactose                  | GC-MS               | Urine                  | [3]       |
|                            | GC-MS               | Serum                  | [1]       |
|                            | NMR                 | Urine                  | [3]       |
| Galactono-1,5-lactone      | GC-MS               | Urine                  | [3]       |
|                            | GC-MS               | Serum                  | [1]       |
| Galacitol                  | GC-MS               | Urine                  | [3]       |
|                            | GC-MS               | Serum                  | [1]       |
| Galactonate                | LC-MS               | Serum                  | [4]       |
|                            | LC-MS               | Urine                  | [4]       |
|                            | NMR                 | Urine                  | [3]       |
|                            | GC-MS               | Serum                  | [1]       |
| Gluconic acid              | LC-MS               | Serum                  | [2]       |
| Delta-Gluconolactone       | LC-MS               | Serum                  | [2]       |
| Blood group H disaccharide | LC-MS               | Serum                  | [4]       |
|                            | LC-MS               | Urine                  | [4]       |
| Lewis A trisaccharide      | LC-MS               | Serum                  | [4]       |
| Allantoin                  | NMR                 | Urine                  | [3]       |
| Hippurate                  | NMR                 | Urine                  | [3]       |
| Methionine                 | NMR                 | Serum                  | [1]       |
| <b>Cheese</b>              |                     |                        |           |
| Pentadecanoic acid (C15:0) | GC-MS               | Serum                  | [1]       |
| Heptadecanoic acid (C17:0) | GC-MS               | Serum                  | [1]       |
| 3-Phenyllactic acid        | GC-MS               | Urine                  | [3]       |
|                            | GC-MS               | Serum                  | [1]       |
| 3-Hydroxyisobutyrate       | NMR                 | Serum                  | [1]       |
| Aminoadipic acid           | LC-MS               | Serum                  | [4]       |
|                            | LC-MS               | Urine                  | [4]       |
| Citrulline                 | LC-MS               | Serum                  | [4]       |
| Valyl-threonine            | LC-MS               | Serum                  | [4]       |
| Phenylalanyl-proline       | LC-MS               | Serum                  | [4]       |

|                       |       |       |     |
|-----------------------|-------|-------|-----|
|                       |       |       |     |
| Indole-3-lactic acid  | LC-MS | Urine | [4] |
|                       | LC-MS | Serum | [4] |
|                       | LC-MS | Urine | [4] |
| Proline               | LC-MS | Serum | [4] |
|                       | NMR   | Urine | [3] |
|                       | GC-MS | Serum | [1] |
| Alanine               | GC-MS | Urine | [3] |
|                       | NMR   | Urine | [3] |
| Pyroglutamate         | NMR   | Urine | [3] |
| Methionine            | GC-MS | Serum | [1] |
|                       | NMR   | Serum | [1] |
| Leucine               | GC-MS | Serum | [1] |
| Glutamic acid         | GC-MS | Serum | [1] |
| Valine+isoleucine     | NMR   | Serum | [1] |
| <b>Yoghurt</b>        |       |       |     |
| Proline               | LC-MS | Serum | [2] |
| Indole-3-lactic acid  | LC-MS | Serum | [2] |
| Citrulline            | LC-MS | Serum | [2] |
| Lysine                | LC-MS | Serum | [2] |
| Threonine             | LC-MS | Serum | [2] |
| Phenylalanine         | LC-MS | Serum | [2] |
| Asparagine            | LC-MS | Serum | [2] |
| Tyrosine              | LC-MS | Serum | [2] |
| Tryptophan            | LC-MS | Serum | [2] |
| Indole-3-acetaldehyde | LC-MS | Serum | [2] |

FIB, food intake biomarker; GC-MS, gas chromatography mass spectrometry; LC-MS, liquid chromatography mass spectrometry; NMR, nuclear magnetic resonance.

**Table S4.** Multi-marker validation results for previously-identified candidate FIBs for milk, cheese, and yoghurt (Unadjusted Models)<sup>a</sup>

| Analytical Platform           | Biosample   | Biomarker <sup>b</sup>     | qAIC        | Coefficient                      | SE                                                                   | t-value                        | p-value                            | r <sub>ap</sub>                       | R <sup>2</sup>  | MAE               |      |      |       |
|-------------------------------|-------------|----------------------------|-------------|----------------------------------|----------------------------------------------------------------------|--------------------------------|------------------------------------|---------------------------------------|-----------------|-------------------|------|------|-------|
| Milk                          |             |                            |             |                                  |                                                                      |                                |                                    |                                       |                 |                   |      |      |       |
| GC-MS                         | (P)         | C15:0                      | 205.2       | (Int: 5.05)<br>Galactonate: 0.07 | (0.06)<br>0.08                                                       | (87.82)<br>0.92                | (0.00***)<br>0.36                  | 0.13                                  | 0.02            | 87.8              |      |      |       |
|                               |             | C17:0                      |             |                                  |                                                                      |                                |                                    |                                       |                 |                   |      |      |       |
|                               |             | Lactose                    |             |                                  |                                                                      |                                |                                    |                                       |                 |                   |      |      |       |
|                               |             | Galactose                  |             |                                  |                                                                      |                                |                                    |                                       |                 |                   |      |      |       |
|                               |             | Galactitol                 |             |                                  |                                                                      |                                |                                    |                                       |                 |                   |      |      |       |
|                               |             | Methionine                 |             |                                  |                                                                      |                                |                                    |                                       |                 |                   |      |      |       |
|                               | Galactonate | x                          | 221.7       | (Int: 5.12)<br>Galactitol: 0.21  | (0.05)<br>0.10                                                       | (103.53)<br>2.18               | (0.00***)<br>0.03*                 | 0.17                                  | 0.03            | 93.6              |      |      |       |
|                               | Lactose     |                            |             |                                  |                                                                      |                                |                                    |                                       |                 |                   |      |      |       |
|                               | Galactose   |                            |             |                                  |                                                                      |                                |                                    |                                       |                 |                   |      |      |       |
|                               | Galactitol  | x                          |             |                                  |                                                                      |                                |                                    |                                       |                 |                   |      |      |       |
| Hippurate                     |             |                            |             |                                  |                                                                      |                                |                                    |                                       |                 |                   |      |      |       |
| Galactonate                   |             | LC-MS                      | (P)         | Phenylalanine                    | x                                                                    | 210.0                          | (Int: 5.06)<br>Phenylalanine: 0.08 | (0.05)<br>0.05                        | (94.39)<br>1.64 | (0.00***)<br>0.10 | 0.25 | 0.06 | 104.0 |
| Tyrosine                      |             |                            |             |                                  |                                                                      |                                |                                    |                                       |                 |                   |      |      |       |
| Tryptophan                    |             |                            |             |                                  |                                                                      |                                |                                    |                                       |                 |                   |      |      |       |
| Indole-3-propionic acid (IPA) |             |                            |             |                                  |                                                                      |                                |                                    |                                       |                 |                   |      |      |       |
| Indole-3-acetic acid          |             |                            |             |                                  |                                                                      |                                |                                    |                                       |                 |                   |      |      |       |
| Lewis A disaccharide          |             |                            |             |                                  |                                                                      |                                |                                    |                                       |                 |                   |      |      |       |
| Blood Group H trisaccharide   |             |                            | 218.9       | (Int: 5.12)<br>Galactonate: 0.04 | (0.05)<br>0.05                                                       | (102.30)<br>0.92               | (0.00***)<br>0.36                  | 0.12                                  | 0.01            | 96.7              |      |      |       |
| Blood Group H trisaccharide   |             |                            |             |                                  |                                                                      |                                |                                    |                                       |                 |                   |      |      |       |
| Galactonate                   | x           |                            |             |                                  |                                                                      |                                |                                    |                                       |                 |                   |      |      |       |
|                               |             |                            |             |                                  |                                                                      |                                |                                    |                                       |                 |                   |      |      |       |
| Cheese                        |             |                            |             |                                  |                                                                      |                                |                                    |                                       |                 |                   |      |      |       |
| GC-MS                         | (P)         | C15:0                      | x (VIF=1.3) | 294.4                            | (Int: 3.91)<br>C15: 0.21<br>Isoleucine: -0.34<br>Glutamic acid: 0.12 | (0.03)<br>0.07<br>0.11<br>0.07 | (116.50)<br>2.78<br>-3.03<br>1.79  | (0.00***)<br>0.01**<br>0.00**<br>0.08 | 0.16            | 0.03              | 16.8 |      |       |
|                               |             | C17:0                      |             |                                  |                                                                      |                                |                                    |                                       |                 |                   |      |      |       |
|                               |             | 3-Phenyllactic acid        |             |                                  |                                                                      |                                |                                    |                                       |                 |                   |      |      |       |
|                               |             | 3-Hydroxyisobutyrate (HIB) |             |                                  |                                                                      |                                |                                    |                                       |                 |                   |      |      |       |

| Analytical Platform | Biosample | Biomarker <sup>b</sup>     | qAIC  | Coefficient                                       | SE                   | t-value                | p-value                   | r <sub>ap</sub> | R <sup>2</sup> | MAE  |             |
|---------------------|-----------|----------------------------|-------|---------------------------------------------------|----------------------|------------------------|---------------------------|-----------------|----------------|------|-------------|
| LC-MS               |           | Proline                    | 300.4 | (Int: 3.97)<br>Pyroglutamate: -0.12               | 0.03<br>0.10         | 120.99<br>-1.18        | (0.00***)<br>0.24         | 0.11            | 0.01           | 18.4 |             |
|                     |           | Methionine                 |       |                                                   |                      |                        |                           |                 |                |      |             |
|                     |           | Leucine                    |       |                                                   |                      |                        |                           |                 |                |      |             |
|                     |           | Glutamic acid              |       |                                                   |                      |                        |                           |                 |                |      | x (VIF=1.9) |
|                     |           | Valine                     |       |                                                   |                      |                        |                           |                 |                |      |             |
|                     |           | Isoleucine                 |       |                                                   |                      |                        |                           |                 |                |      | x (VIF=2.2) |
|                     | (U)       | 3-Phenyllactic acid        | 286.2 | (Int: 3.88)<br>Proline: 0.06                      | 0.04<br>0.03         | 108.94<br>1.66         | (0.00***)<br>0.10         | 0.06            | 0.00           | 20.2 |             |
|                     |           | Alanine                    |       |                                                   |                      |                        |                           |                 |                |      |             |
|                     |           | Pyroglutamate              |       |                                                   |                      |                        |                           |                 |                |      | x           |
|                     | (P)       | Indole-3-lactic acid (ILA) | 300.0 | (Int: 3.97)<br>Indole-3-lactic acid: 0.18         | 0.03<br>0.11         | 120.23<br>1.62         | (0.00***)<br>0.11         | 0.11            | 0.01           | 22.2 |             |
|                     |           | Proline                    |       |                                                   |                      |                        |                           |                 |                |      | x           |
|                     |           | Phenylalanyl-proline       |       |                                                   |                      |                        |                           |                 |                |      |             |
|                     | (U)       | Indole-3-lactic acid       | 300.0 | (Int: 3.97)<br>Indole-3-lactic acid: 0.18         | 0.03<br>0.11         | 120.23<br>1.62         | (0.00***)<br>0.11         | 0.11            | 0.01           | 22.2 |             |
|                     |           | Phenylalanyl-proline       |       |                                                   |                      |                        |                           |                 |                |      |             |
|                     |           | Proline                    |       |                                                   |                      |                        |                           |                 |                |      |             |
| Yoghurt             |           |                            |       |                                                   |                      |                        |                           |                 |                |      |             |
| LC-MS               | (P)       | Proline                    | 217.9 | (Int: 4.52)<br>Threonine: -0.15<br>Tyrosine: 0.17 | 0.06<br>0.10<br>0.09 | 71.86<br>-1.51<br>1.81 | (0.00***)<br>0.13<br>0.07 | 0.03            | 0.00           | 68.5 |             |
|                     |           | Indole-3-lactic acid       |       |                                                   |                      |                        |                           |                 |                |      |             |
|                     |           | Lysine                     |       |                                                   |                      |                        |                           |                 |                |      |             |
|                     |           | Threonine                  |       |                                                   |                      |                        |                           |                 |                |      | x (VIF=2.6) |
|                     |           | Phenylalanine              |       |                                                   |                      |                        |                           |                 |                |      |             |
|                     |           | Tyrosine                   |       |                                                   |                      |                        |                           |                 |                |      | x (VIF=2.6) |
|                     |           | Tryptophan                 |       |                                                   |                      |                        |                           |                 |                |      |             |
|                     |           | Indole-3-acetaldehyde      |       |                                                   |                      |                        |                           |                 |                |      |             |

C15:0, pentadecanoic acid; C17:0, heptadecanoic acid; FIB, food intake biomarker; GC-MS, gas chromatography mass spectrometry; MAE, mean absolute error; NA, not applicable; P, plasma; qAIC, quasi-Akaike Information Criterion; r<sub>ap</sub> = correlation between actual and predicted intake; SE, standard error; VIF, variance inflation factor. Significant results are bolded: \* $p \leq 0.05$ , \*\* $p \leq 0.01$ , \*\*\* $p \leq 0.001$ .

<sup>a</sup> Intercept (Int) values for the models are provided in brackets.

<sup>b</sup> Biomarkers and/or covariates included in the model are indicated with an 'x'.



| Analytical Platform | Biosample | Biomarker <sup>b</sup>     | Sex | BMI | Age | qAIC  | Coefficient                                                                                 | SE                                                         | t-value                                                       | p-value                                                        | r <sub>ap</sub> | R <sup>2</sup> | MAE         |
|---------------------|-----------|----------------------------|-----|-----|-----|-------|---------------------------------------------------------------------------------------------|------------------------------------------------------------|---------------------------------------------------------------|----------------------------------------------------------------|-----------------|----------------|-------------|
| LC-MS               |           | Proline                    |     |     |     |       | <b>Glutamic acid:</b><br>0.12                                                               |                                                            |                                                               |                                                                |                 |                |             |
|                     |           | Methionine                 |     |     |     |       |                                                                                             |                                                            |                                                               |                                                                |                 |                |             |
|                     |           | Leucine                    |     |     |     |       |                                                                                             |                                                            |                                                               |                                                                |                 |                |             |
|                     |           | Glutamic acid              |     |     |     |       |                                                                                             |                                                            |                                                               |                                                                |                 |                |             |
|                     |           | Valine                     |     |     |     |       |                                                                                             |                                                            |                                                               |                                                                |                 |                |             |
|                     |           | Isoleucine                 |     |     |     |       |                                                                                             |                                                            |                                                               |                                                                |                 |                |             |
|                     | (U)       | 3-Phenyllactic acid        |     |     | x   | 301.9 | <b>(Int: 4.01)</b><br><b>Age: -0.14</b>                                                     | <b>(0.04)</b><br><b>0.07</b>                               | <b>(103.50)</b><br><b>-2.02</b>                               | <b>(0.00***)</b><br><b>0.05*</b>                               | <b>0.27</b>     | <b>0.07</b>    | <b>18.4</b> |
|                     |           | Alanine                    |     |     |     |       |                                                                                             |                                                            |                                                               |                                                                |                 |                |             |
|                     |           | Pyroglutamate              |     |     |     |       |                                                                                             |                                                            |                                                               |                                                                |                 |                |             |
|                     | (P)       | Indole-3-lactic acid (ILA) | x   | x   |     | 292.0 | (Int: 4.03)<br>Proline: 0.07<br>Sex: -0.15<br>BMI: -0.13                                    | (0.07)<br>0.03<br>0.08<br>0.07                             | (56.31)<br>1.93<br>-1.89<br>-1.77                             | (0.00***)<br>0.06<br>0.06<br>0.08                              | 0.10            | 0.01           | 20.3        |
|                     |           | Proline                    |     |     |     |       |                                                                                             |                                                            |                                                               |                                                                |                 |                |             |
|                     |           | Phenylalanyl-proline       |     |     |     |       |                                                                                             |                                                            |                                                               |                                                                |                 |                |             |
|                     | (U)       | Indole-3-lactic acid       |     |     | x   | 301.4 | <b>(Int: 4.01)</b><br><b>Age: -0.14</b>                                                     | <b>(0.04)</b><br><b>0.07</b>                               | <b>(102.74)</b><br><b>-1.98</b>                               | <b>(0.00***)</b><br><b>0.05*</b>                               | <b>0.16</b>     | <b>0.02</b>    | <b>21.9</b> |
|                     |           | Phenylalanyl-proline       |     |     |     |       |                                                                                             |                                                            |                                                               |                                                                |                 |                |             |
|                     |           | Proline                    |     |     |     |       |                                                                                             |                                                            |                                                               |                                                                |                 |                |             |
| <b>Yoghurt</b>      |           |                            |     |     |     |       |                                                                                             |                                                            |                                                               |                                                                |                 |                |             |
| LC-MS               | (P)       | Proline                    | x   |     |     | 221.7 | <b>(Int: 4.67)</b><br><b>Threonine: -0.18</b><br><b>Tyrosine: 0.20</b><br><b>Sex: -0.22</b> | <b>(0.10)</b><br><b>0.10</b><br><b>0.09</b><br><b>0.13</b> | <b>(45.61)</b><br><b>-1.80</b><br><b>2.16</b><br><b>-1.72</b> | <b>(0.00***)</b><br><b>0.07</b><br><b>0.03*</b><br><b>0.09</b> | <b>0.03</b>     | <b>0.00</b>    | <b>68.4</b> |
|                     |           | Indole-3-lactic acid       |     |     |     |       |                                                                                             |                                                            |                                                               |                                                                |                 |                |             |
|                     |           | Lysine                     |     |     |     |       |                                                                                             |                                                            |                                                               |                                                                |                 |                |             |
|                     |           | Threonine                  |     |     |     |       |                                                                                             |                                                            |                                                               |                                                                |                 |                |             |
|                     |           | Phenylalanine              |     |     |     |       |                                                                                             |                                                            |                                                               |                                                                |                 |                |             |
|                     |           | Tyrosine                   |     |     |     |       |                                                                                             |                                                            |                                                               |                                                                |                 |                |             |
|                     |           | Tryptophan                 |     |     |     |       |                                                                                             |                                                            |                                                               |                                                                |                 |                |             |
|                     |           | Indole-3-acetaldehyde      |     |     |     |       |                                                                                             |                                                            |                                                               |                                                                |                 |                |             |

BMI, body mass index; C15:0, pentadecanoic acid; C17:0, heptadecanoic acid; FIB, food intake biomarker; GC-MS, gas chromatography mass spectrometry; MAE, mean absolute error; NA, not applicable; P, plasma; aAIC, quasi-Akaike Information Criterion; rap = correlation between actual and predicted intake; SE, standard error; VIF, variance inflation factor. Significant results are bolded: \* $p \leq 0.05$ , \*\* $p \leq 0.01$ , \*\*\* $p \leq 0.001$ .

<sup>a</sup> Intercept (Int) values for the models are provided in brackets.

<sup>b</sup> Biomarkers and/or covariates included in the model are indicated with an 'x'.



**Table S6.** Multi-marker validation results for pentadecanoic acid (C15:0) and heptadecanoic acid (C17:0) by dairy group

|                                 | Analytical Platform<br>(Biosample) | Biomarker           | Sex | BMI | Age | qAIC  | Coefficient                                          | SE                             | t-value                               | p-value                                 | r <sub>ap</sub> | R <sup>2</sup> | MAE   |
|---------------------------------|------------------------------------|---------------------|-----|-----|-----|-------|------------------------------------------------------|--------------------------------|---------------------------------------|-----------------------------------------|-----------------|----------------|-------|
| <b>Total Dairy</b>              |                                    |                     |     |     |     |       |                                                      |                                |                                       |                                         |                 |                |       |
| Unadjusted <sup>a</sup>         | GC-MS (P)                          | C15:0 x<br>C17:0    | NA  | NA  | NA  | 227.3 | (Int: 5.89)<br>C15: 0.16                             | (0.03)<br>0.07                 | (176.558)<br>2.318                    | (0.000***)<br>0.021*                    | 0.06            | 0.00           | 130.9 |
| Adjusted <sup>a</sup>           | GC-MS (P)                          | C15:0 x<br>C17:0    | x   | x   |     | 227.9 | (Int: 6.05)<br>C15: 0.18<br>Sex: -0.16<br>BMI: -0.13 | (0.06)<br>0.07<br>0.07<br>0.07 | (94.379)<br>2.649<br>-2.348<br>-1.867 | (0.000***)<br>0.009*<br>0.020*<br>0.063 | 0.31            | 0.10           | 122.5 |
| <b>High-fat Dairy</b>           |                                    |                     |     |     |     |       |                                                      |                                |                                       |                                         |                 |                |       |
| Unadjusted <sup>a</sup>         | GC-MS (P)                          | C15:0 x<br>C17:0    | NA  | NA  | NA  | 207.2 | (Int: 4.22)<br>C15: 0.15                             | (0.06)<br>0.12                 | (73.557)<br>1.255                     | (0.000***)<br>0.211                     | 0.03            | 0.00           | 56.2  |
| Adjusted <sup>a</sup>           | GC-MS (P)                          | C15:0 x<br>C17:0    |     |     |     | 205.2 | (Int: 4.22)<br>C15: 0.15                             | (0.06)<br>0.12                 | (73.557)<br>1.255                     | (0.000***)<br>0.211                     | 0.03            | 0.00           | 56.2  |
| <b>Low-fat Dairy</b>            |                                    |                     |     |     |     |       |                                                      |                                |                                       |                                         |                 |                |       |
| Unadjusted <sup>a</sup>         | GC-MS (P)                          | C15:0 x<br>C17:0    | NA  | NA  | NA  | 222.5 | (Int: 5.68)<br>C15: 0.16                             | (0.04)<br>0.09                 | (137.717)<br>1.905                    | (0.000***)<br>0.058                     | 0.07            | 0.01           | 139.5 |
| Adjusted <sup>a</sup>           | GC-MS (P)                          | C15:0 x<br>C17:0    | x   | x   |     | 224.6 | (Int: 5.86)<br>C15: 0.19<br>Sex: -0.19<br>BMI: -0.13 | (0.08)<br>0.09<br>0.09<br>0.08 | (74.310)<br>2.201<br>-2.208<br>-1.564 | (0.000***)<br>0.029*<br>0.028*<br>0.119 | 0.25            | 0.06           | 137.7 |
| <b>Total Fermented Dairy</b>    |                                    |                     |     |     |     |       |                                                      |                                |                                       |                                         |                 |                |       |
| Unadjusted <sup>a</sup>         | GC-MS (P)                          | C15:0 x<br>C17:0    | NA  | NA  | NA  | 215.0 | (Int: 5.25)<br>C15: 0.27                             | (0.04)<br>0.09                 | (121.322)<br>3.022                    | (0.000***)<br>0.003**                   | 0.01            | 0.00           | 107.3 |
| Adjusted <sup>a</sup>           | GC-MS (P)                          | C15:0 x<br>C17:0    | x   |     |     | 215.7 | (Int: 5.32)<br>C15: 0.23<br>Age: -0.24               | (0.05)<br>0.09<br>0.10         | (105.187)<br>2.586<br>-2.418          | (0.000***)<br>0.010*<br>0.017*          | 0.07            | 0.01           | 107.3 |
| <b>High-fat Fermented Dairy</b> |                                    |                     |     |     |     |       |                                                      |                                |                                       |                                         |                 |                |       |
| Unadjusted <sup>a</sup>         | GC-MS (P)                          | C15:0 x<br>C17:0    | NA  | NA  | NA  | 198.9 | (Int: 3.80)<br>C15: 0.20                             | (0.06)<br>0.13                 | (61.54)<br>1.59                       | (0.00***)<br>0.11                       | 0.18            | 0.03           | 35.7  |
| Adjusted <sup>a</sup>           | GC-MS (P)                          | C15:0 X (VIF = 9.0) |     |     |     | 203.9 | (Int: 3.80)                                          | (0.06)                         | (61.50)                               | (0.00***)                               | 0.22            | 0.05           | 35.6  |

| Analytical Platform<br>(Biosample) |           | Biomarker | Sex           | BMI | Age | qAIC  | Coefficient | SE          | t-value | p-value   | r <sub>ap</sub> | R <sup>2</sup> | MAE   |       |
|------------------------------------|-----------|-----------|---------------|-----|-----|-------|-------------|-------------|---------|-----------|-----------------|----------------|-------|-------|
|                                    |           | C17:0     | x (VIF = 9.0) |     |     |       | C15: 0.68   | 0.34        | 1.97    | 0.05*     |                 |                |       |       |
|                                    |           |           |               |     |     |       | C17: -0.59  | 0.40        | -1.47   | 0.14      |                 |                |       |       |
| Low-fat Fermented Dairy            |           |           |               |     |     |       |             |             |         |           |                 |                |       |       |
| Unadjusted <sup>a</sup>            | GC-MS (P) | C15:0     | x             | NA  | NA  | NA    | 207.9       | (Int: 4.98) | (0.06)  | (88.22)   | (0.00***)       | -0.03          | 0.00  | 101.1 |
|                                    |           | C17:0     |               |     |     |       |             | C15: 0.29   | 0.12    | 2.50      | 0.01*           |                |       |       |
| Adjusted <sup>a</sup>              | GC-MS (P) | C15:0     | x             | x   | x   | 211.4 | (Int: 5.09) | (0.06)      | (79.17) | (0.00***) | 0.03            | 0.00           | 103.6 |       |
|                                    |           | C17:0     |               |     |     |       | C15: 0.23   | 0.12        | 2.03    | 0.04*     |                 |                |       |       |
|                                    |           |           |               |     |     |       | Age: -0.36  | 0.13        | -2.77   | 0.01*     |                 |                |       |       |
| Total Non-fermented Dairy          |           |           |               |     |     |       |             |             |         |           |                 |                |       |       |
| Unadjusted <sup>a</sup>            | GC-MS (P) | C15:0     | x             | NA  | NA  | NA    | 211.2       | (Int: 5.14) | (0.05)  | (97.24)   | (0.00***)       | 0.12           | 0.01  | 87.3  |
|                                    |           | C17:0     |               |     |     |       |             | C15: 0.04   | 0.11    | 0.33      | 0.74            |                |       |       |
| Adjusted <sup>a</sup>              | GC-MS (P) | C15:0     | x             | x   | x   | 212.1 | (Int: 5.35) | (0.10)      | (53.74) | (0.00***) | 0.09            | 0.01           | 87.2  |       |
|                                    |           | C17:0     |               |     |     |       | BMI: -0.16  | 0.11        | -1.47   | 0.14      |                 |                |       |       |
|                                    |           |           |               |     |     |       | Sex: -0.23  | 0.11        | -2.14   | 0.03*     |                 |                |       |       |
| High-fat Non-fermented Dairy       |           |           |               |     |     |       |             |             |         |           |                 |                |       |       |
| Unadjusted <sup>a</sup>            | GC-MS (P) | C15:0     | x             | NA  | NA  | NA    | 179.8       | (Int: 3.71) | (0.06)  | (60.83)   | (0.00***)       | -0.13          | 0.02  | 29.5  |
|                                    |           | C17:0     |               |     |     |       |             | C15: 0.03   | 0.13    | 0.22      | 0.83            |                |       |       |
| Adjusted <sup>a</sup>              | GC-MS (P) | C15:0     |               | x   | x   | 181.5 | (Int: 3.77) | (0.07)      | (53.18) | (0.00***) | 0.14            | 0.02           | 29.1  |       |
|                                    |           | C17:0     |               |     |     |       | Age: -0.19  | 0.13        | -1.44   | 0.15      |                 |                |       |       |
| Low-fat Non-fermented Dairy        |           |           |               |     |     |       |             |             |         |           |                 |                |       |       |
| Unadjusted <sup>a</sup>            | GC-MS (P) | C15:0     | x             | NA  | NA  | NA    | 203.1       | (Int: 4.99) | (0.06)  | (81.55)   | (0.00***)       | 0.15           | 0.02  | 97.1  |
|                                    |           | C17:0     |               |     |     |       |             | C15: 0.03   | 0.13    | 0.27      | 0.79            |                |       |       |
| Adjusted <sup>a</sup>              | GC-MS (P) | C15:0     |               | x   | x   | 204.1 | (Int: 5.23) | (0.11)      | (45.73) | (0.00***) | 0.16            | 0.02           | 95.4  |       |
|                                    |           | C17:0     |               |     |     |       | BMI: -0.18  | 0.13        | -1.41   | 0.16      |                 |                |       |       |
|                                    |           |           |               |     |     |       | Sex: -0.27  | 0.13        | -2.12   | 0.04*     |                 |                |       |       |

BMI, body mass index; C15:0, pentadecanoic acid; C17:0, heptadecanoic acid; GC-MS, gas chromatography mass spectrometry; MAE, mean absolute error; NA, not applicable; P, plasma; aAIC, quasi-Akaike Information Criterion; rap = correlation between actual and predicted intake; SE, standard error; VIF, variance inflation factor. Significant results are bolded: \* $p \leq 0.05$ , \*\* $p \leq 0.01$ , \*\*\* $p \leq 0.001$ .

<sup>a</sup> Intercept (Int) values for the models are provided in brackets.

<sup>b</sup> Biomarkers and/or covariates included in the model are indicated with an 'x'.

**Table S7.** Significant Spearman's Correlations for Fermented and Non-Fermented Dairy Groups

| Platform (biosample) | Dairy Food/Group             | Compound                   | Spearman's correlation coefficient (r <sub>s</sub> ) | p-value |
|----------------------|------------------------------|----------------------------|------------------------------------------------------|---------|
| GC-MS (P)            | Cheese (fermented)           | Proline                    | -0.160                                               | 0.022   |
| GC-MS (P)            | High-fat fermented dairy     | Galactitol                 | -0.146                                               | 0.038   |
| GC-MS (P)            | High-fat fermented dairy     | Galactonate                | -0.158                                               | 0.024   |
| GC-MS (P)            | High-fat fermented dairy     | Isoleucine                 | -0.159                                               | 0.023   |
| GC-MS (P)            | High-fat fermented dairy     | Leucine                    | -0.152                                               | 0.030   |
| GC-MS (P)            | High-fat fermented dairy     | Methionine                 | -0.160                                               | 0.022   |
| GC-MS (P)            | High-fat fermented dairy     | Proline                    | -0.208                                               | 0.003   |
| GC-MS (P)            | High-fat fermented dairy     | Valine                     | -0.178                                               | 0.011   |
| GC-MS (P)            | High-fat fermented dairy     | 3-Hydroxyisobutyrate       | -0.185                                               | 0.008   |
| GC-MS (P)            | High-fat fermented dairy     | 3-Phenyllactic acid        | -0.164                                               | 0.019   |
| GC-MS (P)            | Low-fat fermented dairy      | Galactitol                 | 0.145                                                | 0.038   |
| GC-MS (P)            | Low-fat fermented dairy      | Galactonate                | 0.193                                                | 0.006   |
| GC-MS (P)            | Low-fat fermented dairy      | Heptadecanoic acid (C17:0) | 0.155                                                | 0.027   |
| GC-MS (P)            | Low-fat fermented dairy      | Lactose                    | 0.207                                                | 0.003   |
| GC-MS (P)            | Low-fat fermented dairy      | Pentadecanoic acid (C15:0) | 0.193                                                | 0.006   |
| GC-MS (P)            | Low-fat fermented dairy      | Valine                     | 0.141                                                | 0.044   |
| GC-MS (P)            | Low-fat fermented dairy      | 3-Hydroxyisobutyrate       | 0.229                                                | 0.001   |
| GC-MS (P)            | High-fat non-fermented dairy | Galactonate                | -0.163                                               | 0.020   |
| GC-MS (P)            | High-fat non-fermented dairy | Glutamic acid              | -0.162                                               | 0.021   |
| GC-MS (P)            | High-fat non-fermented dairy | Isoleucine                 | -0.269                                               | 0.000   |
| GC-MS (P)            | High-fat non-fermented dairy | Lactose                    | -0.145                                               | 0.039   |
| GC-MS (P)            | High-fat non-fermented dairy | Leucine                    | -0.152                                               | 0.030   |
| GC-MS (P)            | High-fat non-fermented dairy | Methionine                 | -0.236                                               | 0.001   |
| GC-MS (P)            | High-fat non-fermented dairy | Proline                    | -0.27                                                | 0.000   |
| GC-MS (P)            | High-fat non-fermented dairy | Valine                     | -0.279                                               | 0.000   |
| GC-MS (P)            | High-fat non-fermented dairy | 3-Hydroxyisobutyrate       | -0.244                                               | 0.000   |
| GC-MS (P)            | High-fat non-fermented dairy | 3-Phenyllactic acid        | -0.198                                               | 0.005   |
| GC-MS (P)            | Total fermented dairy        | Galactitol                 | 0.145                                                | 0.039   |
| GC-MS (P)            | Total fermented dairy        | Galactonate                | 0.182                                                | 0.009   |

| Platform (biosample) | Dairy Food/Group             | Compound                   | Spearman's correlation coefficient (r <sub>s</sub> ) | p-value |
|----------------------|------------------------------|----------------------------|------------------------------------------------------|---------|
| GC-MS (P)            | Total fermented dairy        | Heptadecanoic acid (C17:0) | 0.187                                                | 0.007   |
| GC-MS (P)            | Total fermented dairy        | Lactose                    | 0.207                                                | 0.003   |
| GC-MS (P)            | Total fermented dairy        | Pentadecanoic acid (C15:0) | 0.236                                                | 0.001   |
| GC-MS (P)            | Total fermented dairy        | 3-Hydroxyisobutyrate       | 0.204                                                | 0.004   |
| GC-MS (P)            | Yoghurt (fermented)          | Galactitol                 | 0.146                                                | 0.037   |
| GC-MS (P)            | Yoghurt (fermented)          | Galactonate                | 0.15                                                 | 0.033   |
| GC-MS (P)            | Yoghurt (fermented)          | Pentadecanoic acid (C15:0) | 0.165                                                | 0.019   |
| GC-MS (U)            | Cheese (fermented)           | Galactitol                 | 0.221                                                | 0.001   |
| GC-MS (U)            | Cheese (fermented)           | Lactose                    | 0.187                                                | 0.006   |
| GC-MS (U)            | High-fat non-fermented dairy | Galactonate                | 0.227                                                | 0.001   |
| GC-MS (U)            | Low-fat fermented dairy      | Galactonate                | 0.182                                                | 0.008   |
| GC-MS (U)            | Low-fat fermented dairy      | 3-Phenyllactic acid        | 0.223                                                | 0.001   |
| GC-MS (U)            | Low-fat non-fermented dairy  | Galactitol                 | 0.191                                                | 0.005   |
| GC-MS (U)            | Low-fat non-fermented dairy  | Lactose                    | 0.168                                                | 0.013   |
| GC-MS (U)            | Milk (non-fermented)         | Alanine                    | 0.135                                                | 0.048   |
| GC-MS (U)            | Milk (non-fermented)         | Galactitol                 | 0.199                                                | 0.003   |
| GC-MS (U)            | Milk (non-fermented)         | Lactose                    | 0.161                                                | 0.018   |
| GC-MS (U)            | Total fermented dairy        | Galactonate                | 0.189                                                | 0.005   |
| GC-MS (U)            | Total fermented dairy        | 3-Phenyllactic acid        | 0.188                                                | 0.006   |
| GC-MS (U)            | Yoghurt (fermented)          | Hippurate                  | 0.141                                                | 0.038   |
| LC-MS (P)            | High-fat non-fermented dairy | Indole-3-acetaldehyde      | 0.174                                                | 0.012   |
| LC-MS (P)            | High-fat non-fermented dairy | Tryptophan                 | 0.161                                                | 0.021   |
| LC-MS (P)            | High-fat non-fermented dairy | Phenylalanine              | 0.137                                                | 0.049   |
| LC-MS (P)            | Low-fat fermented dairy      | Blood group H disaccharide | 0.244                                                | 0.000   |
| LC-MS (P)            | Milk (non-fermented)         | Threonine                  | 0.144                                                | 0.039   |
| LC-MS (P)            | Total fermented dairy        | Blood group H disaccharide | 0.256                                                | 0.000   |
| LC-MS (P)            | Total fermented dairy        | Tyrosine                   | 0.158                                                | 0.024   |
| LC-MS (P)            | Total non-fermented dairy    | Indole-3-acetaldehyde      | 0.153                                                | 0.029   |
| LC-MS (P)            | Total non-fermented dairy    | Tryptophan                 | 0.144                                                | 0.039   |
| LC-MS (P)            | Total non-fermented dairy    | Lysine                     | 0.138                                                | 0.048   |
| LC-MS (P)            | Total non-fermented dairy    | Threonine                  | 0.16                                                 | 0.022   |

| Platform (biosample) | Dairy Food/Group          | Compound                   | Spearman's correlation coefficient (r <sub>s</sub> ) | p-value |
|----------------------|---------------------------|----------------------------|------------------------------------------------------|---------|
| LC-MS (P)            | Yoghurt (fermented)       | Blood group H disaccharide | 0.203                                                | 0.003   |
| LC-MS (U)            | Total non-fermented dairy | Galactonate                | 0.149                                                | 0.049   |

C15:0, pentadecanoic acid; C17:0, heptadecanoic acid; GC-MS, gas chromatography mass spectrometry; LC-MS, liquid chromatography mass spectrometry; P, plasma; U, urine.

Significant indicated as: \* $p \leq 0.05$ , \*\*  $p \leq 0.01$ , \*\*\*  $p \leq 0.001$ .

**Table S8.** Multi-marker validation results for FIBs differentiating between fermented and non-fermented dairy intake by dairy group

| Analytical Platform<br>(Biosample) |           | Biomarker            | VIF | Coefficient | SE     | t-value  | p-value   | r <sub>ap</sub> | R <sup>2</sup> | MAE   |
|------------------------------------|-----------|----------------------|-----|-------------|--------|----------|-----------|-----------------|----------------|-------|
| Total dairy                        |           |                      |     |             |        |          |           |                 |                |       |
| Unadjusted <sup>a</sup>            | GC-MS (P) | (Int)                | NA  | (5.87)      | (0.04) | (156.44) | (0.00***) | 0.24            | 0.06           | 129.2 |
|                                    |           | C15:0                | 1.4 | 0.19        | 0.10   | 1.98     | 0.05*     |                 |                |       |
|                                    |           | Lactose              | 1.4 | 0.18        | 0.06   | 3.04     | 0.00**    |                 |                |       |
|                                    |           | Isoleucine           | 2.6 | -0.12       | 0.14   | -0.88    | 0.38      |                 |                |       |
|                                    |           | Proline              | 2.4 | -0.03       | 0.07   | -0.43    | 0.67      |                 |                |       |
|                                    |           | Galactonate          | 1.6 | 0.05        | 0.06   | 0.84     | 0.40      |                 |                |       |
| Adjusted <sup>a</sup>              | GC-MS (P) | (Int)                | NA  | (5.91)      | (0.05) | (120.92) | (0.00***) | 0.25            | 0.06           | 128.4 |
|                                    |           | C15:0                | 1.4 | 0.19        | 0.10   | 1.99     | 0.05*     |                 |                |       |
|                                    |           | Lactose              | 1.4 | 0.19        | 0.06   | 3.20     | 0.00**    |                 |                |       |
|                                    |           | BMI                  | 1.1 | -0.10       | 0.08   | -1.27    | 0.21      |                 |                |       |
|                                    |           | Galactonate          | 1.7 | 0.06        | 0.06   | 1.02     | 0.31      |                 |                |       |
|                                    |           | Glutamic acid        | 3.3 | -0.15       | 0.10   | -1.47    | 0.14      |                 |                |       |
|                                    |           | Isoleucine           | 2.7 | -0.08       | 0.14   | -0.58    | 0.56      |                 |                |       |
|                                    |           | Proline              | 3.4 | 0.04        | 0.08   | 0.46     | 0.65      |                 |                |       |
| High-fat dairy                     |           |                      |     |             |        |          |           |                 |                |       |
| Unadjusted <sup>a</sup>            | GC-MS (P) | (Int)                | NA  | (4.12)      | (0.06) | (68.33)  | (0.00***) | 0.50            | 0.25           | 52.0  |
|                                    |           | C15:0                | 1.6 | 0.29        | 0.16   | 1.76     | 0.08      |                 |                |       |
|                                    |           | Glutamic acid        | 3.2 | 0.16        | 0.15   | 1.05     | 0.30      |                 |                |       |
|                                    |           | Proline              | 3.0 | -0.21       | 0.12   | -1.75    | 0.08      |                 |                |       |
|                                    |           | 3-Hydroxyisobutyrate | 2.4 | -0.41       | 0.20   | -2.04    | 0.04*     |                 |                |       |
| Adjusted <sup>a</sup>              | GC-MS (P) | (Int)                | NA  | (4.12)      | (0.06) | (68.33)  | (0.00***) | 0.50            | 0.25           | 52.0  |
|                                    |           | C15:0                | 1.6 | 0.29        | 0.16   | 1.76     | 0.08      |                 |                |       |
|                                    |           | 3-Hydroxyisobutyrate | 2.4 | -0.41       | 0.20   | -2.04    | 0.04*     |                 |                |       |
|                                    |           | Glutamic acid        | 3.2 | 0.16        | 0.15   | 1.05     | 0.30      |                 |                |       |
|                                    |           | Proline              | 3.0 | -0.21       | 0.12   | -1.75    | 0.08      |                 |                |       |
| Low-fat dairy                      |           |                      |     |             |        |          |           |                 |                |       |
| Unadjusted <sup>a</sup>            | GC-MS (P) | (Int)                | NA  | (5.67)      | (0.04) | (125.96) | (0.00***) | 0.27            | 0.07           | 131.4 |
|                                    |           | Galactonate          | 1.7 | 0.09        | 0.07   | 1.21     | 0.23      |                 |                |       |

|                          |           |                      |      |        |        |          |           |      |      |       |
|--------------------------|-----------|----------------------|------|--------|--------|----------|-----------|------|------|-------|
| Adjusted <sup>a</sup>    | GC-MS (P) | Lactose              | 1.4  | 0.21   | 0.07   | 3.21     | 0.00**    | 0.31 | 0.10 | 130.0 |
|                          |           | Glutamic acid        | 3.0  | -0.16  | 0.11   | -1.40    | 0.16      |      |      |       |
|                          |           | Isoleucine           | 2.1  | 0.10   | 0.15   | 0.67     | 0.51      |      |      |       |
|                          |           | Proline              | 3.0  | 0.02   | 0.09   | 0.17     | 0.87      |      |      |       |
|                          |           | (Int)                | NA   | (5.71) | (0.06) | (97.98)  | (0.00***) |      |      |       |
|                          |           | Galactonate          | 1.7  | 0.09   | 0.07   | 1.24     | 0.22      |      |      |       |
|                          |           | Lactose              | 1.4  | 0.22   | 0.07   | 3.29     | 0.00**    |      |      |       |
|                          |           | BMI                  | 1.1  | -0.10  | 0.10   | -1.09    | 0.28      |      |      |       |
|                          |           | Glutamic acid        | 3.3  | -0.20  | 0.12   | -1.66    | 0.10      |      |      |       |
|                          |           | Isoleucine           | 2.1  | 0.09   | 0.15   | 0.62     | 0.53      |      |      |       |
| Proline                  | 3.0       | 0.03                 | 0.09 | 0.34   | 0.73   |          |           |      |      |       |
| Total fermented dairy    |           |                      |      |        |        |          |           |      |      |       |
| Unadjusted <sup>a</sup>  | GC-MS (P) | (Int)                | NA   | (5.19) | (0.05) | (112.93) | (0.00***) | 0.22 | 0.05 | 100.7 |
|                          |           | Galactonate          | 1.6  | 0.07   | 0.07   | 0.95     | 0.34      |      |      |       |
|                          |           | Glutamic acid        | 2.4  | -0.09  | 0.10   | -0.87    | 0.38      |      |      |       |
|                          |           | Lactose              | 1.4  | 0.30   | 0.06   | 4.77     | 0.00***   |      |      |       |
|                          |           | C15:0                | 1.4  | 0.27   | 0.12   | 2.30     | 0.02*     |      |      |       |
|                          |           | Methionine           | 3.0  | -0.25  | 0.17   | -1.48    | 0.14      |      |      |       |
|                          |           | 3-Hydroxyisobutyrate | 2.9  | 0.20   | 0.16   | 1.28     | 0.20      |      |      |       |
| Adjusted <sup>a</sup>    | GC-MS (P) | (Int)                | NA   | (5.27) | (0.05) | (98.90)  | (0.00***) | 0.20 | 0.04 | 100.7 |
|                          |           | C15:0                | 1.5  | 0.22   | 0.12   | 1.83     | 0.07      |      |      |       |
|                          |           | Lactose              | 1.4  | 0.28   | 0.06   | 4.59     | 0.00***   |      |      |       |
|                          |           | Age                  | 1.1  | -0.26  | 0.10   | -2.52    | 0.01*     |      |      |       |
|                          |           | Galactonate          | 1.7  | 0.03   | 0.07   | 0.47     | 0.64      |      |      |       |
|                          |           | Glutamic acid        | 2.5  | -0.12  | 0.10   | -1.17    | 0.24      |      |      |       |
|                          |           | Methionine           | 3.1  | -0.21  | 0.17   | -1.22    | 0.23      |      |      |       |
|                          |           | 3-Hydroxyisobutyrate | 2.9  | 0.25   | 0.16   | 1.57     | 0.12      |      |      |       |
| High-fat fermented dairy |           |                      |      |        |        |          |           |      |      |       |
| Unadjusted <sup>a</sup>  | GC-MS (P) | (Int)                | NA   | (3.72) | (0.07) | (57.27)  | (0.00***) | 0.37 | 0.14 | 34.6  |
|                          |           | C15:0                | 1.6  | 0.31   | 0.18   | 1.77     | 0.08      |      |      |       |
|                          |           | 3-Hydroxyisobutyrate | 2.4  | -0.41  | 0.22   | -1.87    | 0.06      |      |      |       |
|                          |           | Glutamic acid        | 3.1  | 0.22   | 0.17   | 1.31     | 0.19      |      |      |       |

|                           |           |                      |     |        |        |         |           |      |      |      |
|---------------------------|-----------|----------------------|-----|--------|--------|---------|-----------|------|------|------|
| Adjusted <sup>a</sup>     | GC-MS (P) | Proline              | 3.0 | -0.14  | 0.13   | -1.07   | 0.29      | 0.40 | 0.16 | 35.1 |
|                           |           | (Int)                | NA  | (3.80) | (0.08) | (46.43) | (0.00***) |      |      |      |
|                           |           | C15:0                | 1.3 | 0.34   | 0.16   | 2.18    | 0.03*     |      |      |      |
|                           |           | 3-Hydroxyisobutyrate | 1.3 | -0.40  | 0.16   | -2.50   | 0.01*     |      |      |      |
|                           |           | BMI                  | 1.1 | -0.19  | 0.14   | -1.40   | 0.16      |      |      |      |
| Low-fat fermented dairy   |           |                      |     |        |        |         |           |      |      |      |
| Unadjusted <sup>a</sup>   | GC-MS (P) | (Int)                | NA  | (4.91) | (0.06) | (80.62) | (0.00***) | 0.25 | 0.06 | 93.1 |
|                           |           | C15:0                | 1.4 | 0.26   | 0.15   | 1.65    | 0.10      |      |      |      |
|                           |           | Lactose              | 1.4 | 0.34   | 0.08   | 4.53    | 0.00***   |      |      |      |
|                           |           | 3-Hydroxyisobutyrate | 2.8 | 0.37   | 0.21   | 1.79    | 0.08      |      |      |      |
|                           |           | Galactonate          | 1.6 | 0.11   | 0.09   | 1.21    | 0.23      |      |      |      |
|                           |           | Glutamic acid        | 2.4 | -0.15  | 0.13   | -1.17   | 0.25      |      |      |      |
|                           |           | Methionine           | 3.0 | -0.27  | 0.22   | -1.23   | 0.22      |      |      |      |
| Adjusted <sup>a</sup>     | GC-MS (P) | (Int)                | NA  | (5.03) | (0.07) | (72.85) | (0.00***) | 0.21 | 0.04 | 94.9 |
|                           |           | C15:0                | 1.5 | 0.17   | 0.15   | 1.07    | 0.29      |      |      |      |
|                           |           | Lactose              | 1.4 | 0.32   | 0.07   | 4.31    | 0.00***   |      |      |      |
|                           |           | 3-Hydroxyisobutyrate | 3.3 | 0.44   | 0.22   | 2.05    | 0.04*     |      |      |      |
|                           |           | Age                  | 1.1 | -0.40  | 0.14   | -2.83   | 0.01**    |      |      |      |
|                           |           | Galactonate          | 1.7 | 0.07   | 0.09   | 0.69    | 0.49      |      |      |      |
|                           |           | Glutamic acid        | 2.4 | -0.19  | 0.13   | -1.53   | 0.13      |      |      |      |
|                           |           | Leucine              | 2.4 | -0.04  | 0.24   | -0.16   | 0.87      |      |      |      |
|                           |           | Methionine           | 3.5 | -0.19  | 0.23   | -0.82   | 0.41      |      |      |      |
| Total non-fermented dairy |           |                      |     |        |        |         |           |      |      |      |
| Unadjusted <sup>a</sup>   | GC-MS (P) | (Int)                | NA  | (5.14) | (0.06) | (85.34) | (0.00***) | 0.00 | 0.00 | 89.0 |
|                           |           | 3-Hydroxyisobutyrate | 1.5 | -0.25  | 0.16   | -1.61   | 0.11      |      |      |      |
|                           |           | Galactonate          | 1.5 | 0.10   | 0.10   | 1.03    | 0.30      |      |      |      |
|                           |           | Proline              | 1.7 | -0.01  | 0.10   | -0.13   | 0.90      |      |      |      |
| Adjusted <sup>a</sup>     | GC-MS (P) | (Int)                | NA  | (5.44) | (0.11) | (47.47) | (0.00***) | 0.02 | 0.00 | 92.8 |
|                           |           | Valine_2TMS          | 2.9 | 0.30   | 0.24   | 1.25    | 0.21      |      |      |      |
|                           |           | 3-Hydroxyisobutyrate | 2.9 | -0.62  | 0.21   | -2.95   | 0.00**    |      |      |      |
|                           |           | BMI                  | 1.1 | -0.22  | 0.12   | -1.77   | 0.08      |      |      |      |
|                           |           | Sex                  | 1.2 | -0.35  | 0.13   | -2.74   | 0.01**    |      |      |      |



|                              |           | 3-Phenyllactic acid  | 2.1 | 0.33   | 0.18   | 1.82    | 0.07      |       |      |      |
|------------------------------|-----------|----------------------|-----|--------|--------|---------|-----------|-------|------|------|
| High-fat non-fermented dairy |           |                      |     |        |        |         |           |       |      |      |
| Unadjusted <sup>a</sup>      | GC-MS (P) | (Int)                | NA  | (3.64) | (0.06) | (61.75) | (0.00***) | 0.40  | 0.16 | 27.4 |
|                              |           | C17:0                | 1.4 | 0.38   | 0.17   | 2.30    | 0.02*     |       |      |      |
|                              |           | Isoleucine           | 4.4 | -0.98  | 0.28   | -3.47   | 0.00***   |       |      |      |
|                              |           | Leucine              | 3.6 | 0.65   | 0.33   | 1.99    | 0.05*     |       |      |      |
| Adjusted <sup>a</sup>        | GC-MS (P) | (Int)                | NA  | (3.64) | (0.06) | (61.75) | (0.00***) | 0.40  | 0.16 | 27.4 |
|                              |           | C17:0                | 1.4 | 0.38   | 0.17   | 2.30    | 0.02*     |       |      |      |
|                              |           | Isoleucine           | 4.4 | -0.98  | 0.28   | -3.47   | 0.00***   |       |      |      |
|                              |           | Leucine              | 3.6 | 0.65   | 0.33   | 1.99    | 0.05*     |       |      |      |
| Low-fat non-fermented dairy  |           |                      |     |        |        |         |           |       |      |      |
| Unadjusted <sup>a</sup>      | GC-MS (P) | (Int)                | NA  | (5.01) | (0.07) | (73.72) | (0.00***) | -0.03 | 0.00 | 99.5 |
|                              |           | 3-Hydroxyisobutyrate | 1.5 | -0.27  | 0.18   | -1.50   | 0.14      |       |      |      |
|                              |           | Galactonate          | 1.5 | 0.12   | 0.11   | 1.07    | 0.29      |       |      |      |
|                              |           | Proline              | 1.7 | 0.04   | 0.11   | 0.41    | 0.68      |       |      |      |
| Adjusted <sup>a</sup>        | GC-MS (P) | (Int)                | NA  | (5.33) | (0.13) | (41.72) | (0.00***) | 0.11  | 0.01 | 96.1 |
|                              |           | Valine               | 3.0 | 0.44   | 0.27   | 1.64    | 0.10      |       |      |      |
|                              |           | 3-Hydroxyisobutyrate | 2.9 | -0.69  | 0.23   | -2.95   | 0.00**    |       |      |      |
|                              |           | Sex                  | 1.2 | -0.37  | 0.14   | -2.63   | 0.01**    |       |      |      |
|                              |           | BMI                  | 1.1 | -0.24  | 0.14   | -1.75   | 0.08      |       |      |      |
|                              |           | 3-Phenyllactic acid  | 2.1 | 0.37   | 0.20   | 1.82    | 0.07      |       |      |      |

BMI, body mass index; C15:0, pentadecanoic acid; C17:0, heptadecanoic acid; FIB, food intake biomarker; GC-MS, gas chromatography mass spectrometry; MAE, mean absolute error; NA, not applicable; P, plasma; aAIC, quasi-Akaike Information Criterion; SE, standard error; VIF, variance inflation factor. Significant results are bolded: \* $p \leq 0.05$ , \*\* $p \leq 0.01$ , \*\*\* $p \leq 0.001$ .

<sup>a</sup> Intercept (Int) values for the models are provided in brackets.

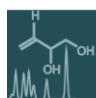

**Table S9.** Classification of dairy foods in the NQplus food frequency questionnaire.

| Dairy Food Item               | Fermentation Status | Subgroup     | Fat Content <sup>a</sup> (g/100g food) | Fat Classification <sup>b</sup> |
|-------------------------------|---------------------|--------------|----------------------------------------|---------------------------------|
| Buttermilk                    | Fermented           | Buttermilk   | 0.2                                    | Skim                            |
| Low-fat cheese (20+/30+)      | Fermented           | Cheese       | 14.1                                   | Semi-skim                       |
| Regular cheese (40+)          | Fermented           | Cheese       | 23.9                                   | Semi-skim                       |
| Regular cheese (48+)          | Fermented           | Cheese       | 30.3                                   | Full fat                        |
| Cheese as snack               | Fermented           | Cheese       | 28.9                                   | Semi-skim                       |
| Cheese with hot meal          | Fermented           | Cheese       | 28.9                                   | Semi-skim                       |
| Fat luxury cheese             | Fermented           | Cheese       | 35.1                                   | Full fat                        |
| Less-fat luxury cheese        | Fermented           | Cheese       | 22.0                                   | Semi-skim                       |
| Unknown cheese                | Fermented           | Cheese       | 28.5                                   | Semi-skim                       |
| (Fruit) quark with breakfast  | Fermented           | Quark        | 2.5                                    | Skim                            |
| Full (fruit) yoghurt          | Fermented           | Yoghurt      | 2.8                                    | Full fat                        |
| Full yoghurt                  | Fermented           | Yoghurt      | 2.8                                    | Full fat                        |
| Semi-skim (fruit) yoghurt     | Fermented           | Yoghurt      | 1.5                                    | Semi-skim                       |
| Semi-skim yoghurt             | Fermented           | Yoghurt      | 1.8                                    | Semi-skim                       |
| Skim (fruit) yoghurt          | Fermented           | Yoghurt      | 0.2                                    | Skim                            |
| Skim yoghurt                  | Fermented           | Yoghurt      | 0.2                                    | Skim                            |
| Unknown yoghurt               | Fermented           | Yoghurt      | 1.8                                    | Semi-skim                       |
| Butter                        | Non-fermented       | Butter       | 81.1                                   | Full fat                        |
| Skim Butter                   | Non-fermented       | Butter       | 37.0                                   | Semi-skim                       |
| Coffee cream                  | Non-fermented       | Cream        | 9.4                                    | Full fat                        |
| Cream with hot meal           | Non-fermented       | Cream        | 34.2                                   | Full fat                        |
| Whipped cream                 | Non-fermented       | Cream        | 14.8                                   | Full fat                        |
| Milk-based ice cream          | Non-fermented       | Ice cream    | 12.0                                   | Full fat                        |
| Diet coffee milk              | Non-fermented       | Milk         | 4.2                                    | Full fat                        |
| Full chocolate milk           | Non-fermented       | Milk         | 2.8                                    | Full fat                        |
| Full milk                     | Non-fermented       | Milk         | 3.5                                    | Full fat                        |
| Full-fat milk with breakfast  | Non-fermented       | Milk         | 3.5                                    | Full fat                        |
| Regular full milk             | Non-fermented       | Milk         | 3.5                                    | Full fat                        |
| Regular semi-skim milk        | Non-fermented       | Milk         | 1.5                                    | Semi-skim                       |
| Semi-skim chocolate milk      | Non-fermented       | Milk         | 1.4                                    | Semi-skim                       |
| Semi-skim coffee milk         | Non-fermented       | Milk         | 4.1                                    | Full fat                        |
| Semi-skim milk                | Non-fermented       | Milk         | 1.5                                    | Semi-skim                       |
| Semi-skim milk with breakfast | Non-fermented       | Milk         | 1.5                                    | Semi-skim                       |
| Skim chocolate milk           | Non-fermented       | Milk         | 0.5                                    | Skim                            |
| Skim milk                     | Non-fermented       | Milk         | 0.1                                    | Skim                            |
| Unknown chocolate milk        | Non-fermented       | Milk         | 1.0                                    | Semi-skim                       |
| Unknown coffee milk           | Non-fermented       | Milk         | 7.3                                    | Full fat                        |
| Unknown milk                  | Non-fermented       | Milk         | 1.4                                    | Semi-skim                       |
| Milk powder for coffee        | Non-fermented       | Milk, powder | 32.3                                   | Full fat                        |

<sup>a</sup> The fat content (g/100g) for all dairy products was determined based on values reported in the Dutch Food Composition Table [1].

<sup>b</sup> Fat classification was based on the guidelines set by the Dutch Dairy Commodities Act (Overheid.nl. Warenwetbesluit Zuivel), where full-fat dairy included milk and milk products with a fat content >1.80%, cheeses with a fat content ≥50%, and curd cheese/quark and cream cheese with a fat content ≥35%, semi-skim dairy included milk and milk products with a fat content ≥1.50% to ≤1.80%, cheeses with a fat content >10% to <50%, and curd cheese/quark and cream cheese with a fat content ≥10% to ≤34%, and skim dairy included milk and milk products with a fat content ≤0.5%, cheeses with a fat content ≤10%, and curd cheese/quark and cream cheese with a fat content <10%. Additional qualifiers for determining the fat content of Dutch cheeses (based on fat content dry matter) included: full-fat cheese (45+ to 60+), semi-skim cheese (10+ to 40+), and skim cheese (≤10).

**Table S10.** List of suppliers of analytical standards.

| Compound                   | Supplier                                                             |
|----------------------------|----------------------------------------------------------------------|
| 3-Hydroxyisobutyrate       | Sigma-Aldrich, Switzerland, ≥96.0% (sodium salt)                     |
| L-(−)-3-Phenyllactic acid  | Sigma-Aldrich, Switzerland, ≥99.0%                                   |
| L-Alanine                  | MSML kit (IROA Technologies, LLC, Bolton, MA; Gainesville, FL)       |
| Allantoin                  | MSML kit (IROA Technologies, LLC, Bolton, MA; Gainesville, FL)       |
| Alpha-aminoadipate         | MSML kit (IROA Technologies, LLC, Bolton, MA; Gainesville, FL)       |
| L-Asparagine               | MSML kit (IROA Technologies, LLC, Bolton, MA; Gainesville, FL)       |
| Blood group H disaccharide | Carbosynth, Compton, Newbury, UK                                     |
| Citrulline                 | MSML kit (IROA Technologies, LLC, Bolton, MA; Gainesville, FL)       |
| Delta-Gluconolactone       | MSML kit (IROA Technologies, LLC, Bolton, MA; Gainesville, FL)       |
| Galactitol                 | MSML kit (IROA Technologies, LLC, Bolton, MA; Gainesville, FL)       |
| Galactonate                | Sigma-Aldrich, Switzerland, ≥98.0%                                   |
| Galactono-1,5-lactone      | Sigma-Aldrich, Switzerland, ≥99.0% (forms 3 derivatives in solution) |
| D-Galactose                | MSML kit (IROA Technologies, LLC, Bolton, MA; Gainesville, FL)       |
| Gluconic acid              | MSML kit (IROA Technologies, LLC, Bolton, MA; Gainesville, FL)       |
| L-Glutamic acid            | MSML kit (IROA Technologies, LLC, Bolton, MA; Gainesville, FL)       |
| Heptadecanoic acid (C17:0) | MSML kit (IROA Technologies, LLC, Bolton, MA; Gainesville, FL)       |
| Hippurate                  | MSML kit (IROA Technologies, LLC, Bolton, MA; Gainesville, FL)       |
| Indole-3-acetaldehyde      | MSML kit (IROA Technologies, LLC, Bolton, MA; Gainesville, FL)       |
| Indole-3-acetic acid       | Sigma-Aldrich, Switzerland, ≥98.0%                                   |
| Indole-3-lactic acid       | Sigma-Aldrich Chemie GmbH (Buchs, Switzerland)                       |
| Indole-3-propionic acid    | Sigma-Aldrich Chemie GmbH (Buchs, Switzerland)                       |
| D-Lactose                  | MSML kit (IROA Technologies, LLC, Bolton, MA; Gainesville, FL)       |
| Leucine                    | MSML kit (IROA Technologies, LLC, Bolton, MA; Gainesville, FL)       |
| Lewis A trisaccharide      | Carbosynth, Compton, Newbury, UK                                     |
| L-Lysine                   | MSML kit (IROA Technologies, LLC, Bolton, MA; Gainesville, FL)       |
| L-Methionine               | MSML kit (IROA Technologies, LLC, Bolton, MA; Gainesville, FL)       |
| Pentadecanoic acid (C15:0) | Sigma-Aldrich, Switzerland, ≥99.0%                                   |
| L-Phenylalanine            | MSML kit (IROA Technologies, LLC, Bolton, MA; Gainesville, FL)       |
| Phenylalanyl-proline       | Synpeptide Co Ltd, Shanghai, China                                   |
| L-Proline                  | MSML kit (IROA Technologies, LLC, Bolton, MA; Gainesville, FL)       |
| Pyroglutamate              | Synpeptide Co Ltd, Shanghai, China                                   |
| Taurine                    | MSML kit (IROA Technologies, LLC, Bolton, MA; Gainesville, FL)       |
| L-Threonine                | MSML kit (IROA Technologies, LLC, Bolton, MA; Gainesville, FL)       |
| L-Tryptophan               | MSML kit (IROA Technologies, LLC, Bolton, MA; Gainesville, FL)       |
| L-Tyrosine                 | KitMSML kit (IROA Technologies, LLC, Bolton, MA; Gainesville, FL)    |
| Valine+isoleucine          | Synpeptide Co Ltd, Shanghai, China                                   |
| Valyl-threonine            | Synpeptide Co Ltd, Shanghai, China                                   |

11

12

13

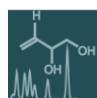

**Table S11.** Identification features of compounds analyzed by LC-MS.

| Identification             | Biosample | RT (min) | m/z        | Adducts                         | Measured neutral mass (Da) | Theoretical neutral mass (Da) |
|----------------------------|-----------|----------|------------|---------------------------------|----------------------------|-------------------------------|
| Phenylalanine              | Plasma    | 3.23     | 166.0858   | M+H, 2M+H                       | 165.0788                   | 165.07898                     |
| Tyrosine                   | Plasma    | 2.08     | 182.0804   | M+H                             | 181.0734                   | 181.07389                     |
| Tryptophan                 | Plasma    | 4.07     | 205.0968   | M+H, M+Na, 2M+Na, 2M+H          | 204.0898                   | 204.08988                     |
| Indole-3-propionic acid    | Plasma    | 8.03     | 190.0865   | M+H, M+Na, M+H-H <sub>2</sub> O | -                          | 189.07898                     |
| Indole-3-acetic acid       | Plasma    | 7.1      | 176.0698   | M+H                             | 175.0628                   | 175.06333                     |
| Blood group H disaccharide | Plasma    | 0.92     | 349.1113   | M+Na                            | -                          | 326.1213                      |
| Lewis A                    | Plasma    | 7.3      | 512.2018   | M+H-H <sub>2</sub> O            | -                          | 529.20067                     |
| Phenylalanyl-proline       | Plasma    | 4.94     | 263.1386   | M+H                             | -                          | 262.13174                     |
| Indole-3-lactic acid       | Plasma    | 6.37     | 206.0811   | M+H, M+Na                       | 205.0741                   | 205.07389                     |
| Proline                    | Plasma    | 1.04     | 116.0704   | M+H                             | 115.0634                   | 115.06333                     |
| Lysine                     | Plasma    | 0.81     | 147.1125   | M+H                             | 146.1055                   | 146.10553                     |
| Threonine                  | Plasma    | 0.93     | 164.029    | M+2Na-H                         | -                          | 119.05824                     |
| Indole-3-acetaldehyde      | Plasma    | 4.07     | 160.0754   | M+H                             | -                          | 159.06841                     |
| Galactonate                | Urine     | 0.97     | 219.048069 | M+Na                            | 196.0583                   | 196.0583                      |
| Blood group H disaccharide | Urine     | 1.19     | 349.1101   | M+Na, M+H                       | -                          | 326.1213                      |
| Phenylalanyl-proline       | Urine     | 4.98     | 263.1383   | M+H                             | -                          | 262.13174                     |
| Indole-3-lactic acid       | Urine     | 6.4      | 206.081    | M+H                             | 205.074                    | 205.07389                     |
| Proline                    | Urine     | 1.54     | 116.0704   | M+H                             | -                          | 115.06333                     |

RT, retention time.

**Table S12.** Identification features of compounds analyzed by GC-MS.

| Compound                  | Bio-sample | RT (min) | Quantifier Ion | Qualifier Ion | Ratio (Quant/Qual) | RSD QC | RI sample | RI reference |
|---------------------------|------------|----------|----------------|---------------|--------------------|--------|-----------|--------------|
| 3-Hydroxyisobutyrate 2TMS | Plasma     | 16.71    | 177            | 218           | 50                 | 40.8   | 1150      | 1151         |
| 3-Phenyllactic acid 2TMS  | Plasma     | 26.48    | 193            | 267           | 14                 | 35.9   | 1579      | 1580         |
| Galactitol 6TMS           | Plasma     | 30.83    | 307            | 319           | 120                | 40.5   | 1921      | 1929         |
| Galactonate 6TMS          | Plasma     | 31.4     | 292            | 319/333       | 65/35              | 69.0   | 1976      | 1981         |
| Galactose 5TMS 1MEOXb     | Plasma     | 30.58    | 319            | 160           | 40                 | 23.0   | 1898      | 1898         |
| Glutamic acid 3TMS        | Plasma     | 26.9     | 246            | 348           | 8                  | 62.8   | 1606      | 1604         |
| Heptadecanoic acid 1TMS   | Plasma     | 32.95    | 327            | 342           | 13                 | 33.3   | 2136      | 2138         |
| Isoleucine 2TMS           | Plasma     | 20.5     | 158            | 218           | 22                 | 44.6   | 1285      | 1285         |
| Lactose 8TMS 1MEOXa       | Plasma     | 38.01    | 361            | 319           | 50                 | 435.3  | 2660      | 2671         |
| Leucine 2TMS              | Plasma     | 19.89    | 158            | 232           | 4.5                | 28.1   | 1263      | 1264         |
| Methionine 2TMS           | Plasma     | 25.4     | 176            | 293           | 10                 | 51.5   | 1513      | 1514         |
| Pentadecanoic acid 1TMS   | Plasma     | 31.02    | 299            | 314           | 8                  | 34.7   | 1939      | 1942         |
| Proline 2TMS              | Plasma     | 20.72    | 142            | 216           | 5                  | 79.7   | 1293      | 1289         |
| Valine 2TMS               | Plasma     | 18.33    | 144            | 218           | 20                 | 44.4   | 1207      | 1209         |
| 3-Phenyllactic acid 2TMS  | Urine      | 26.44    | 193            | 267           | 14                 | 29.9   | 1580      | 1580         |
| Alanine 3TMS              | Urine      | 22.19    | 188            | 262           | 17                 | 53.2   | 1356      | 1356         |
| Galactitol 6TMS           | Urine      | 30.79    | 307            | 319           | 175                | 20.9   | 1922      | 1929         |
| Galactonate 6TMS          | Urine      | 31.36    | 292            | 319/333       | 65/35              | 57.5   | 1977      | 1981         |
| Galactose 5TMS 1MEOXb     | Urine      | 30.53    | 319            | 160           | 30                 | 17.5   | 1898      | 1898         |
| Hippurate 1TMS            | Urine      | 29.99    | 105            | 236           | 20                 | 18.6   | 1850      | 1845         |
| Lactose 8TMS 1MEOXa       | Urine      | 37.95    | 361            | 319           | 50                 | 25.4   | 2662      | 2671         |
| Pyroglutamate 2TMS        | Urine      | 25.43    | 156            | 258           | 12                 | 26.5   | 1518      | 1518         |

QC, quality control; RI, Kovats retention index; RT, retention time; RSD, relative standard deviation; TMS, trimethylsilyl.

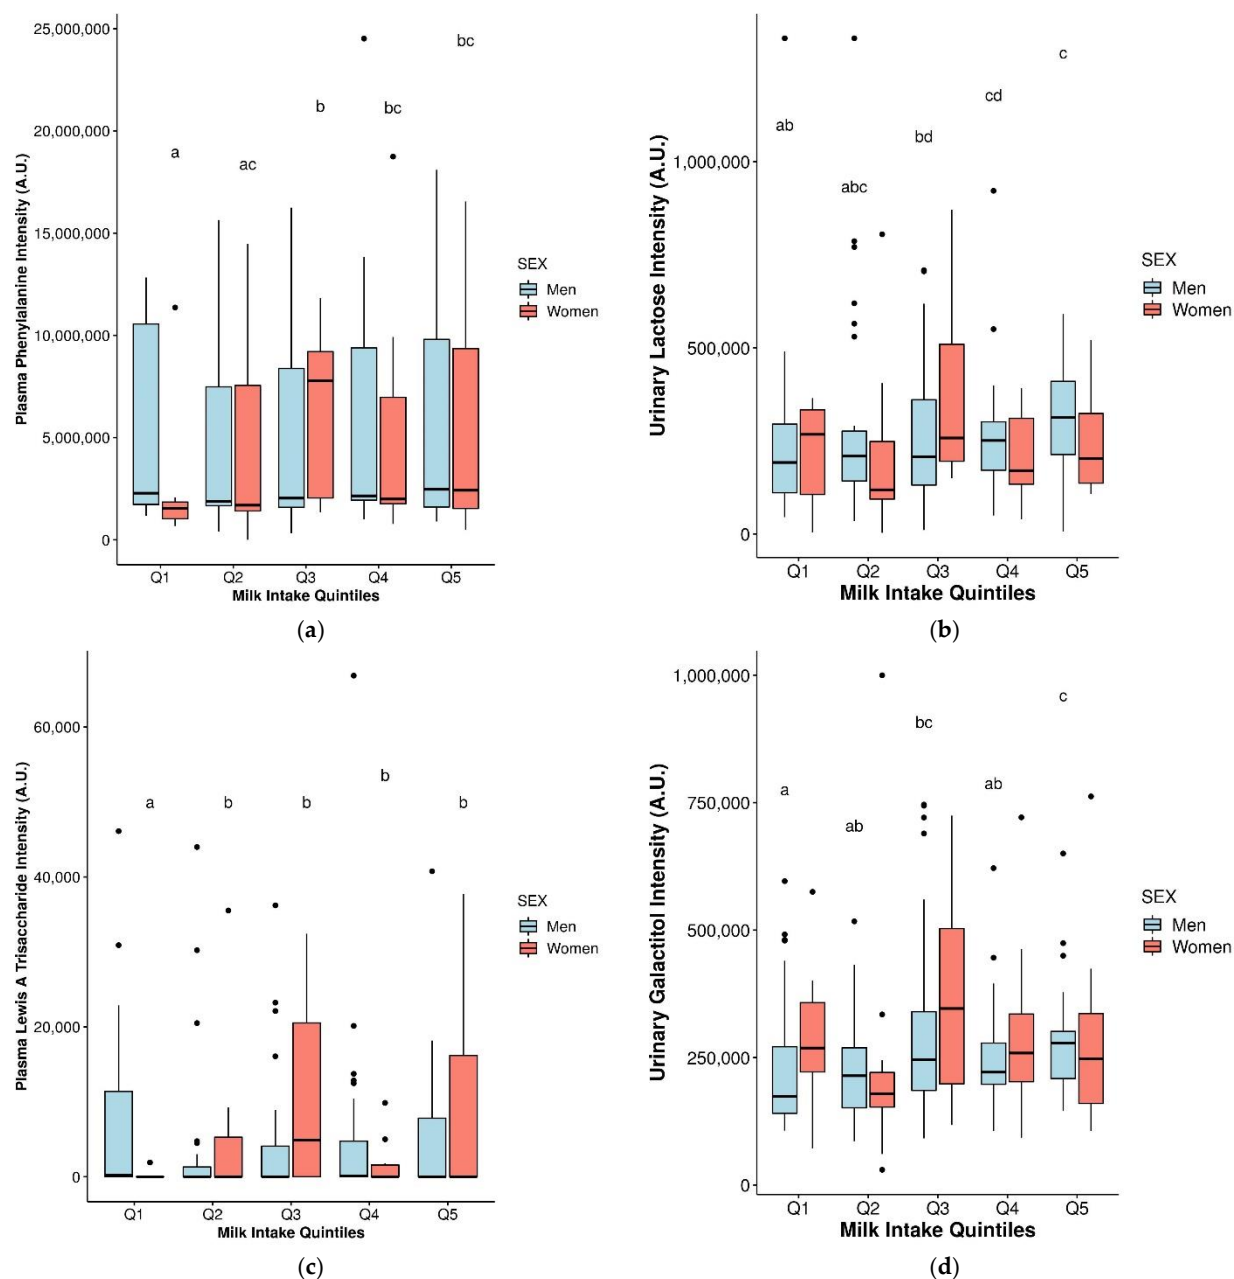

**Figure S1.** Differences in metabolite levels by sex-specific quintiles of milk intake: (a) plasma phenylalanine, (b) urinary lactose, (c) plasma Lewis A trisaccharide, and (d) urinary galactitol. Significance denoted by different letters ( $p \leq 0.05$ ).

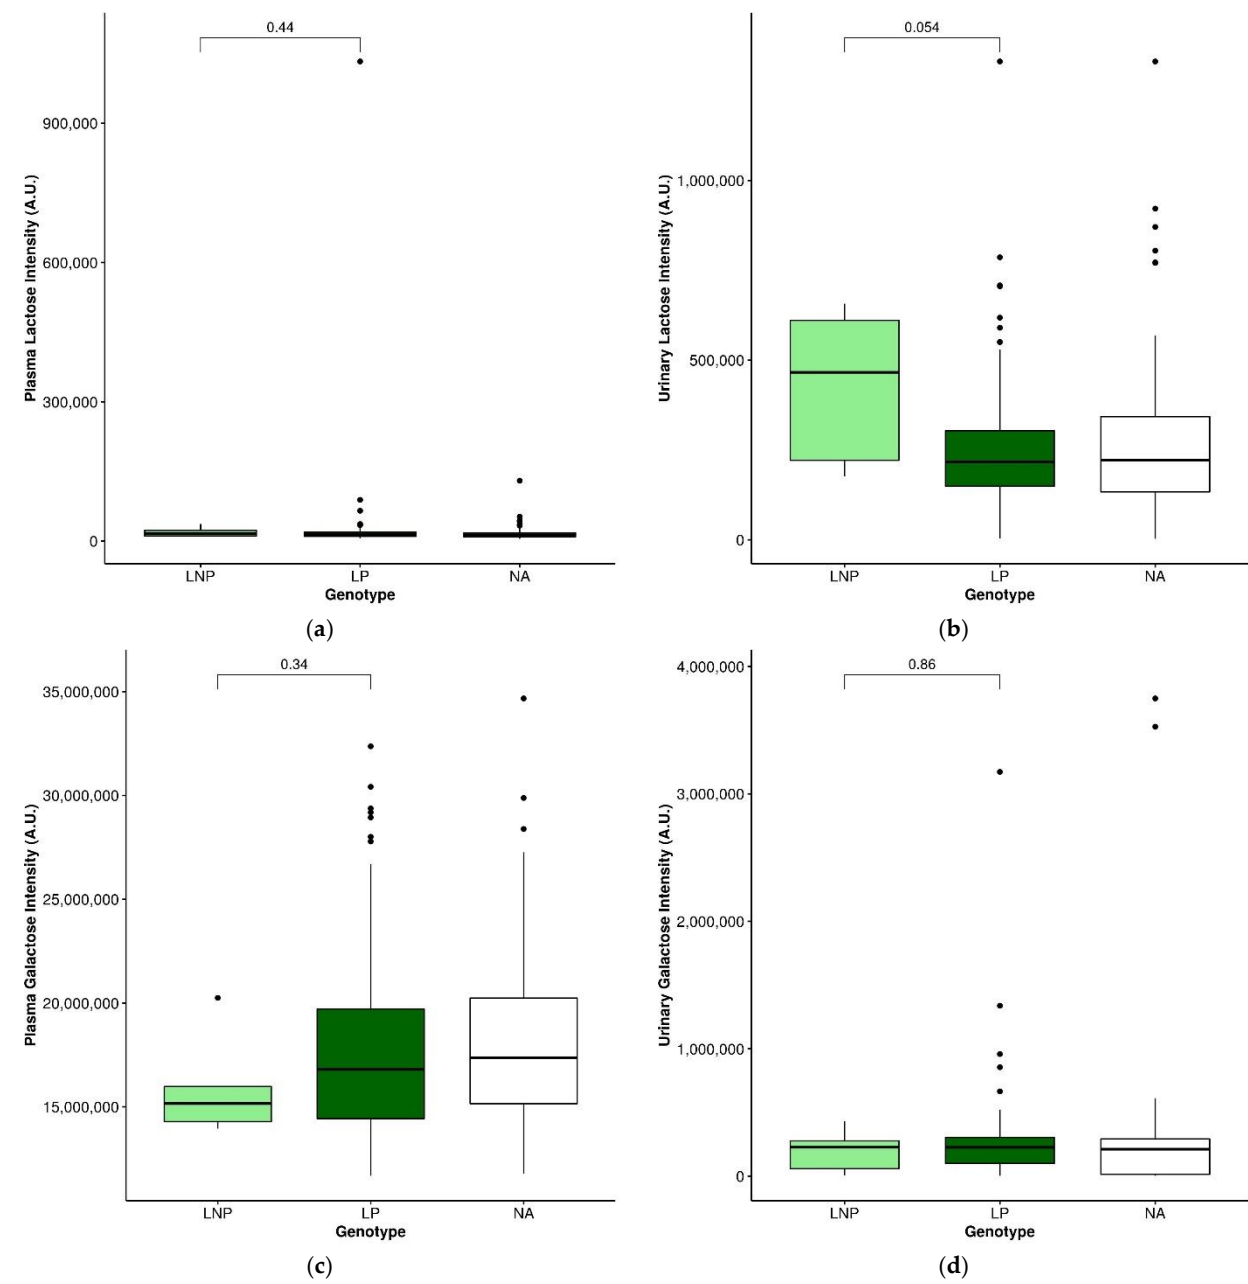

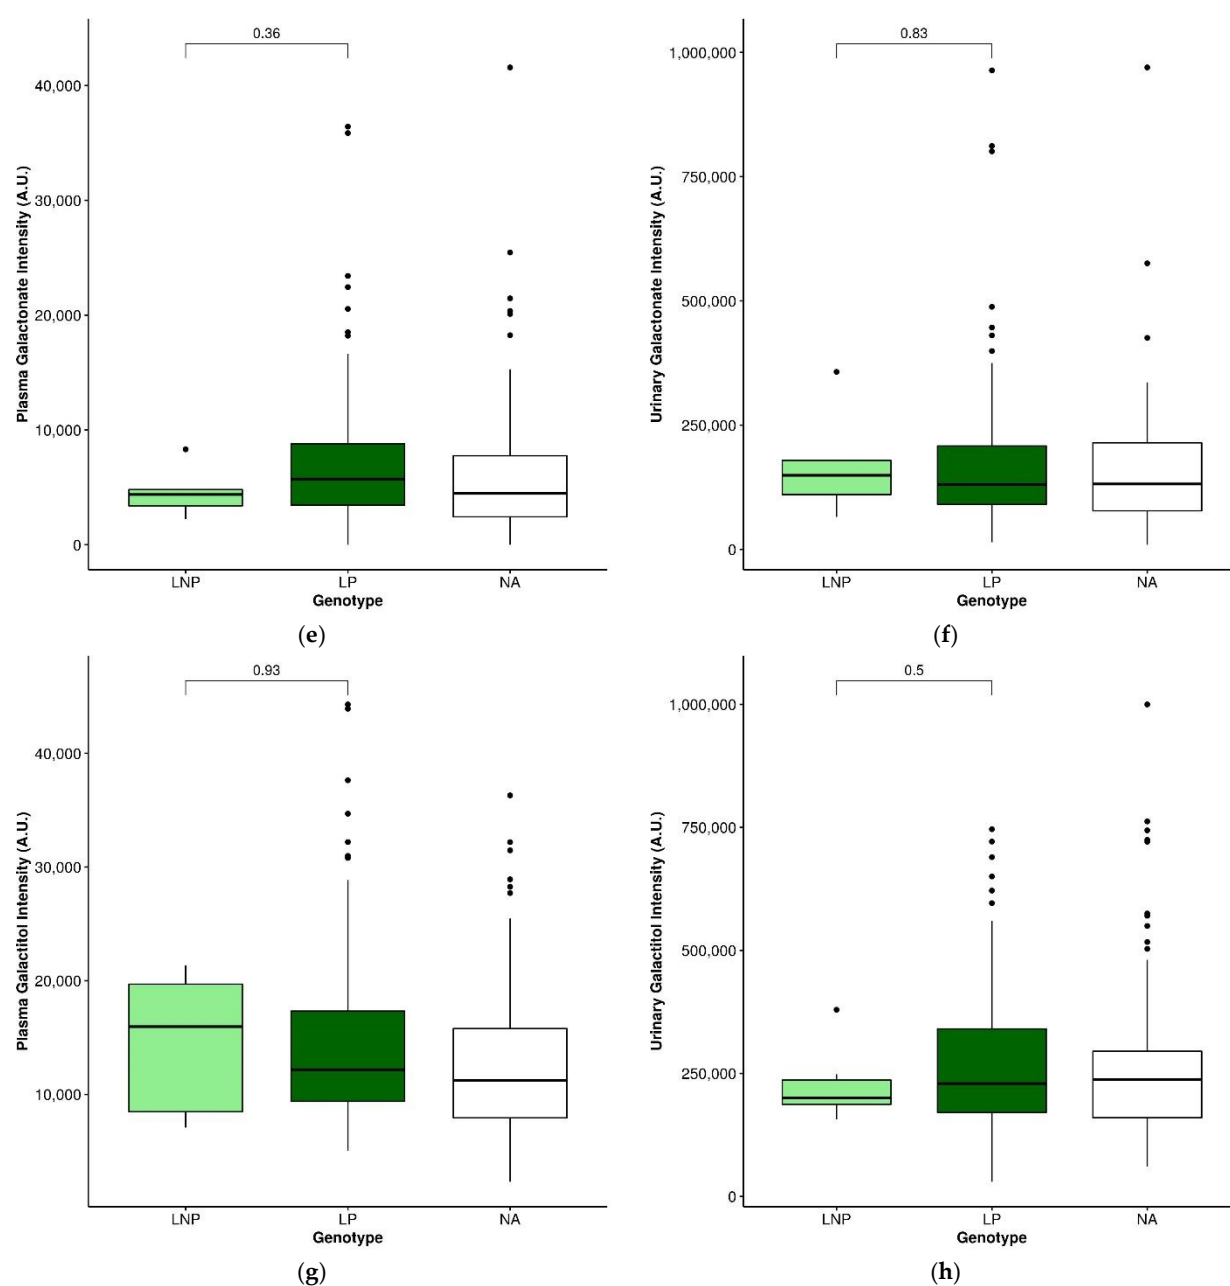

**Figure S2.** Levels of lactose metabolites. (a) plasma lactose (b) urinary lactose, (c) plasma galactose, (d) urinary galactose, (e) plasma galactonate, (f) urinary galactonate, (g) plasma galactitol, (h) urinary galactitol. Galactono-1,5-lactone was not detected in plasma or urine. LNP, lactase non-persistent; LP, lactase persistent; NA, genotype data not available.



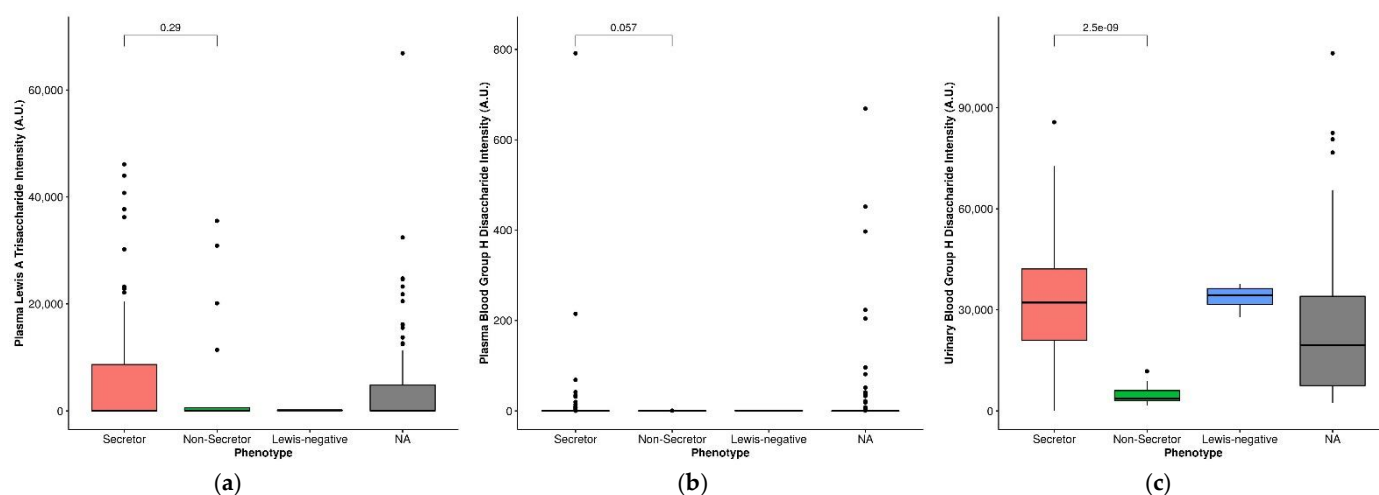

**Figure S3.** Levels of Lewis system-related oligosaccharides by secretion status. (a) plasma Lewis A trisaccharide, (b) plasma Blood Group H disaccharide, (c) urinary Blood Group H disaccharide. NA, genotype data not available.

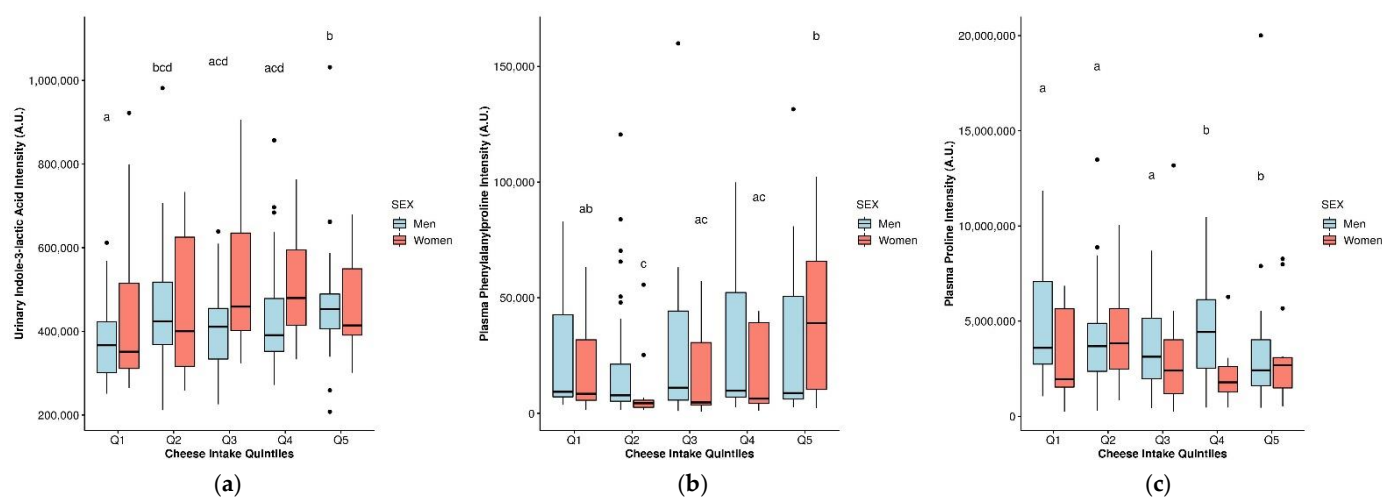

**Figure S4.** Differences in metabolite levels by sex-specific quintiles of cheese intake: (a) urinary indole-3-lactic acid, (b) plasma phenylalanyl-proline, (c) plasma proline. Significance denoted by different letters ( $p \leq 0.05$ ).

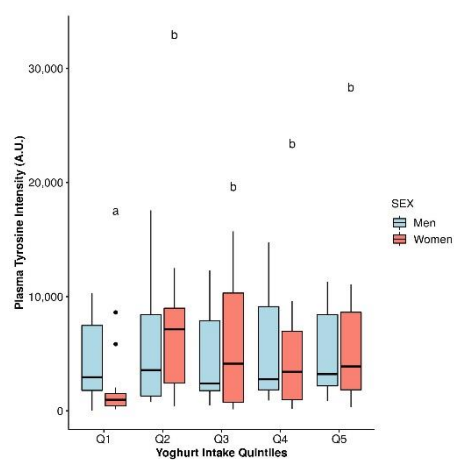

**Figure S5.** Differences in plasma levels of tyrosine by sex-specific quintiles of yoghurt intake. Significance denoted by different letters ( $p \leq 0.05$ ).

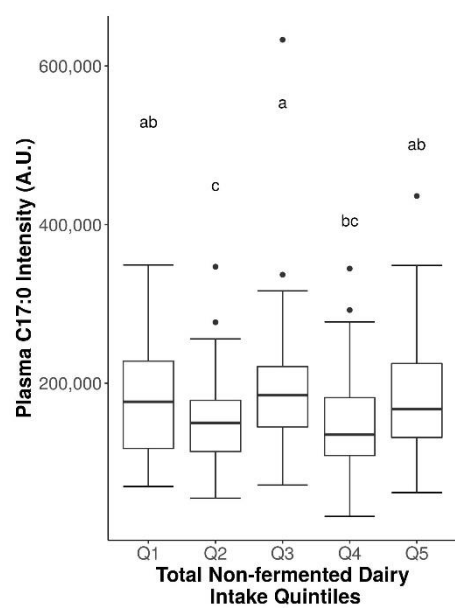

**Figure S6.** Differences in plasma levels of heptadecanoic acid by quintiles of total non-fermented dairy intake. Significance denoted by different letters ( $p \leq 0.05$ ).

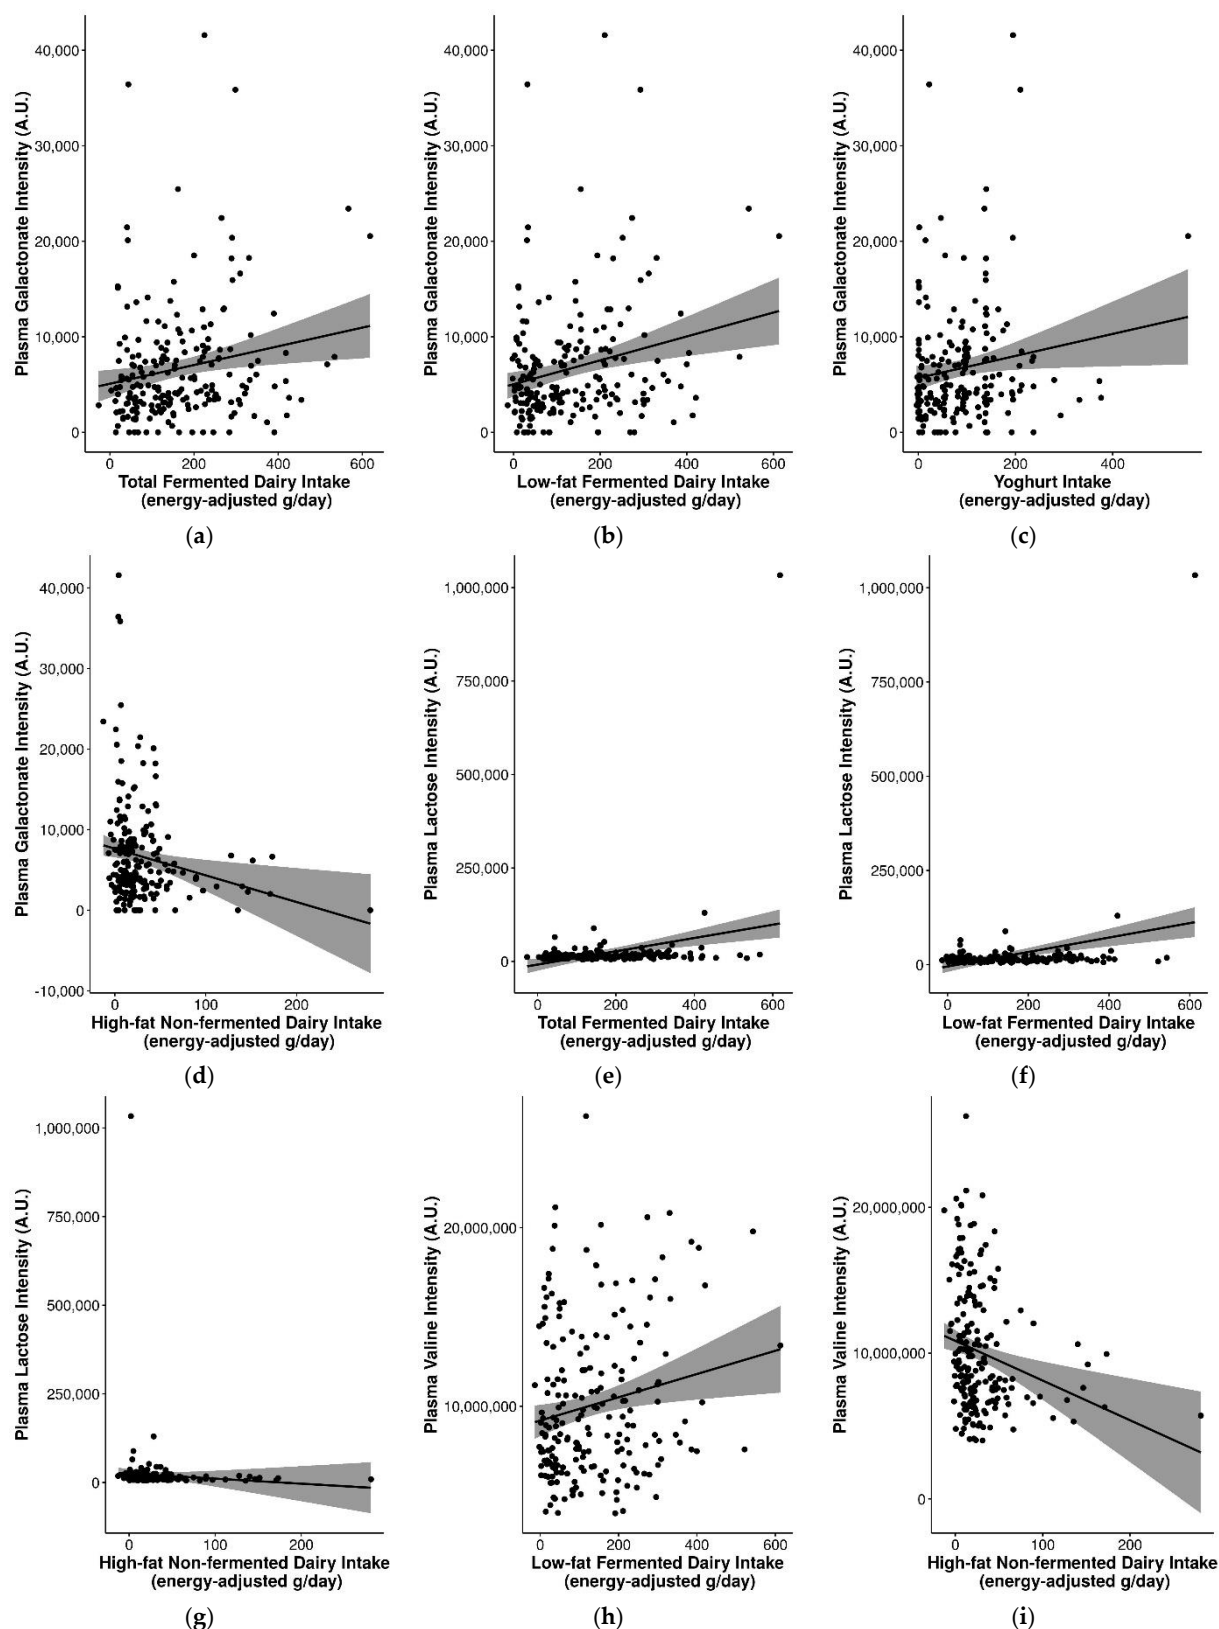

**Figure S7.** Plasma FIBs positively correlated with fermented dairy intake and negatively correlated with non-fermented dairy intake. Plasma galactonate significantly increasing with (a) total fermented dairy, (b) low-fat fermented dairy, and (c) yoghurt intake, and decreasing with (d) high-fat non-fermented dairy intake. Plasma lactose significantly increasing with (e) total fermented dairy and (f) low-fat fermented dairy intake, and decreasing with (g) high-fat non-fermented dairy intake. Plasma valine significantly increasing with (h) low-fat fermented dairy intake, and decreasing with (i) high-fat non-fermented dairy intake.

## Supplemental References

1. The Dutch National Institute for Public Health and the Environment (RIVM) Nevo-Tabel. Netherlands Voedingsstoffenbestand. Den Haag: Voedingscentrum; **2011**. Available online: <https://nevo-online.rivm.nl/> (accessed on 8 December 2020).
2. Trimigno, A.; Münger, L.; Picone, G.; Freiburghaus, C.; Pimentel, G.; Vionnet, N.; Pralong, F.; Capozzi, F.; et al. GC-MS Based Metabolomics and NMR Spectroscopy Investigation of Food Intake Biomarkers for Milk and Cheese in Serum of Healthy Humans. *Metabolites* **2018**, *8* (2), 26. DOI: 10.3390/metabo8020026.
3. Pimentel, G.; Burton, K.J.; von Ah, U.; Butikofer, U.; Pralong, F.P.; Vionnet, N.; Portmann, R.; Vergères, G. Metabolic Footprinting of Fermented Milk Consumption in Serum of Healthy Men. *J. Nutr.* **2018**, *148* (6), 851-860. DOI: 10.1093/jn/nxy053.
4. Münger, L.H.; Trimigno, A.; Picone, G.; Freiburghaus, C.; Pimentel, G.; Burton, K.J.; Pralong, F.P.; Vionnet, N.; Capozzi, F.; Badertscher, R.; et al. Identification of Urinary Food Intake Biomarkers for Milk, Cheese, and Soy-Based Drink by Untargeted GC-MS and NMR in Healthy Humans. *J. Proteome Res.* **2017**, *16* (9), 3321-3335. DOI: 10.1021/acs.jproteome.7b00319.
5. Pimentel, G.; Burnand, D.; Munger, L.H.; Pralong, F.P.; Vionnet, N.; Portmann, R.; Vergères, G. Identification of Milk and Cheese Intake Biomarkers in Healthy Adults Reveals High Interindividual Variability of Lewis System-Related Oligosaccharides. *J. Nutr.* **2020**, *150* (5), 1058-1067. DOI: 10.1093/jn/nxaa029.
